# 1 **Anterior cingulate cortex represents action-state predictions and causally** 2 **mediates model-based reinforcement learning in a two-step decision task.**

3

4 Thomas Akam<sup>1,2\*</sup>, Ines Rodrigues-Vaz<sup>1,3</sup>, Ivo Marcelo<sup>1,4</sup>, Xiangyu Zhang<sup>5</sup>, Michael Pereira<sup>1</sup>, Rodrigo  
5 Freire Oliveira<sup>1</sup>, Peter Dayan<sup>6,7,8</sup>, Rui M. Costa<sup>1,3</sup>

6 Affiliations:

7 1. Champalimaud Neuroscience Program, Champalimaud Centre for the Unknown, Lisbon, Portugal

8 2. Department of Experimental Psychology, Oxford University, Oxford, UK

9 3. Department of Neuroscience and Neurology, Zuckerman Mind Brain Behavior Institute, Columbia  
10 University, New York, NY, USA.

11 4. Department of Psychiatry, Erasmus MC University Medical Center, Rotterdam, 3015 GD, The  
12 Netherlands.

13 5. RIKEN-MIT Center for Neural Circuit Genetics at the Picower Institute for Learning and Memory,  
14 Department of Biology and Department of Brain and Cognitive Sciences. Massachusetts Institute of  
15 Technology, Cambridge, Massachusetts, USA.

16 6. Gatsby Computational Neuroscience Unit, UCL, London, UK.

17 7. Max Planck Institute for Biological Cybernetics, Tübingen, Germany

18 8. University of Tübingen, Germany

19 \* [thomas.akam@psy.ox.ac.uk](mailto:thomas.akam@psy.ox.ac.uk)

20 **Summary:**

21 The anterior cingulate cortex (ACC) is implicated in learning the value of actions, but it remains poorly  
22 understood whether and how it contributes to model-based mechanisms that use action-state  
23 predictions and afford behavioural flexibility. To isolate these mechanisms, we developed a multi-  
24 step decision task for mice in which both action-state transition probabilities and reward probabilities  
25 changed over time. Calcium imaging revealed ramps of choice-selective neuronal activity, followed  
26 by an evolving representation of the state reached and trial outcome, with different neuronal  
27 populations representing reward in different states. ACC neurons represented the current action-  
28 state transition structure, whether state transitions were expected or surprising, and the predicted  
29 state given chosen action. Optogenetic inhibition of ACC blocked the influence of action-state

30 transitions on subsequent choice, without affecting the influence of rewards. These data support a  
31 role for ACC in model-based reinforcement learning, specifically in using action-state transitions to  
32 guide subsequent choice.

### 33 Highlights:

- 34 • A novel two-step task disambiguates model-based and model-free RL in mice.
- 35 • ACC represents all trial events, reward representation is contextualised by state.
- 36 • ACC represents action-state transition structure, predicted states, and surprise.
- 37 • Inhibiting ACC impedes action-state transitions from influencing subsequent choice.

### 38 Introduction:

39 The anterior cingulate cortex (ACC) is a critical contributor to reward guided decision making  
40 (Rushworth and Behrens, 2008; Heilbronner and Hayden, 2016). ACC neurons encode diverse  
41 decision variables (Cai and Padoa-Schioppa, 2012; Ito et al., 2003; Matsumoto et al., 2003; Sul et al.,  
42 2010), and the structure has been particularly associated with action reinforcement (Hadland et al.,  
43 2003; Kennerley et al., 2006; Rudebeck et al., 2008). However, instrumental learning about the value  
44 of actions is not a unitary phenomenon, but rather is thought to be mediated by partly parallel control  
45 systems, model-based and model-free, that use different computational principles to evaluate choices  
46 (Balleine and Dickinson, 1998; Daw et al., 2005; Dolan and Dayan, 2013). Despite suggestive evidence  
47 of ACC's involvement in model-based reinforcement (Daw et al., 2011; Cai and Padoa-Schioppa, 2012;  
48 Karlsson et al., 2012; O'Reilly et al., 2013; Doll et al., 2015; Huang et al., 2020), studies designed to  
49 specifically test this are lacking.

50 To investigate the ACC's role, we need a clear articulation of these parallel systems and a paradigm  
51 that allows their contributions to be distinguished. The former stems from the venerable dissociation  
52 between habitual and goal-directed control (Balleine and Dickinson, 1998; Daw et al., 2005). Well-  
53 practiced actions in familiar environments are controlled by a habitual system, thought to employ  
54 model-free reinforcement learning (RL) (Sutton and Barto, 1998). This uses reward prediction errors  
55 to cache preferences between actions. However, when the environment or motivational state  
56 changes, model-free preferences can become out of date, and actions are instead controlled by a goal-  
57 directed system believed to utilise model-based RL (Sutton and Barto, 1998). This learns a predictive  
58 model of the consequences of actions, i.e. the states and rewards they immediately lead to, and  
59 evaluates options by simulating or otherwise estimating their resulting long-run values. This dual  
60 controller approach is beneficial because model-free and model-based RL have complementary  
61 strengths, the former allowing quick and computationally cheap decision making at the cost of slower

62 adaptation to changes in the environment, the latter flexible and efficient use of new information at  
63 the cost of computational effort and decision speed.

64 For a paradigm that might distinguish between these systems, we started with the recent class of  
65 multi-step decision tasks (Daw et al., 2011; Simon and Daw, 2011; Huys et al., 2012). Canonically, on  
66 each trial, subjects traverse states in a decision tree to reach rewards, often with ongoing changes in  
67 the state transition and/or reward probabilities to force continuous learning and surface differences  
68 between flexible and inflexible decision-making processes. The so-called two-step task (Daw et al.,  
69 2011) is perhaps the most popular, with variants used to probe mechanisms of model-based RL (Daw  
70 et al., 2011; Wunderlich et al., 2012; Smittenaar et al., 2013; Doll et al., 2015) and arbitration between  
71 controllers (Keramati et al., 2011; Lee et al., 2014; Doll et al., 2016), and to identify behavioural  
72 differences in psychiatric disorders (Sebold et al., 2014; Voon et al., 2015; Gillan et al., 2016). Versions  
73 of the two-step task for rats (Miller et al., 2017; Dezfouli and Balleine, 2017; Hasz and Redish, 2018;  
74 Groman et al., 2019) and monkeys (Miranda et al., 2019) have recently been developed.

75 However, we have shown that with the sort of extensive experience on two-step tasks necessary for  
76 investigations with animals, subjects can, in principle, acquire a sophisticated, memory-based,  
77 representation of a latent state of the environment which confounds model-free and model-based  
78 planning (Akam et al., 2015). This would limit our ability to determine the ACC's specific contributions.

79 Here, we report a novel murine two-step task designed to avoid this confound, and apply the task to  
80 probe the involvement of ACC in model-based and model-free control. The new task induces  
81 unsignalled structural changes in the decision-tree that complicate the use of latent state based  
82 strategies, whilst still permitting conventional model-based planning. We show that mice readily learn  
83 this task and show behaviour consistent with a mixture of model-based and model-free RL.

84 Calcium imaging of ACC neurons whilst animals performed the task revealed that different populations  
85 participated across the different stages of each trial, representing all trial events, but with a stronger  
86 representation of states reached in the decision tree than rewards obtained, and different neurons  
87 representing reward in different states. Additionally, the ACC represented a set of variables required  
88 for model-based RL, including the current configuration of the action-state transition probabilities  
89 (i.e., the probabilities of transitions in the decision tree), the actual predicted state given chosen  
90 action, and whether observed state transitions were expected or surprising given current knowledge  
91 of the tree. Consistent with this, single-trial optogenetic inhibition of ACC selectively disrupted the  
92 influence of action-state transitions on subsequent choice, while sparing the influence of rewards.  
93 Accordingly, the strength of the effect of ACC inhibition for each individual subject was closely  
94 correlated with the degree to which that subject used model-based RL to solve the task.

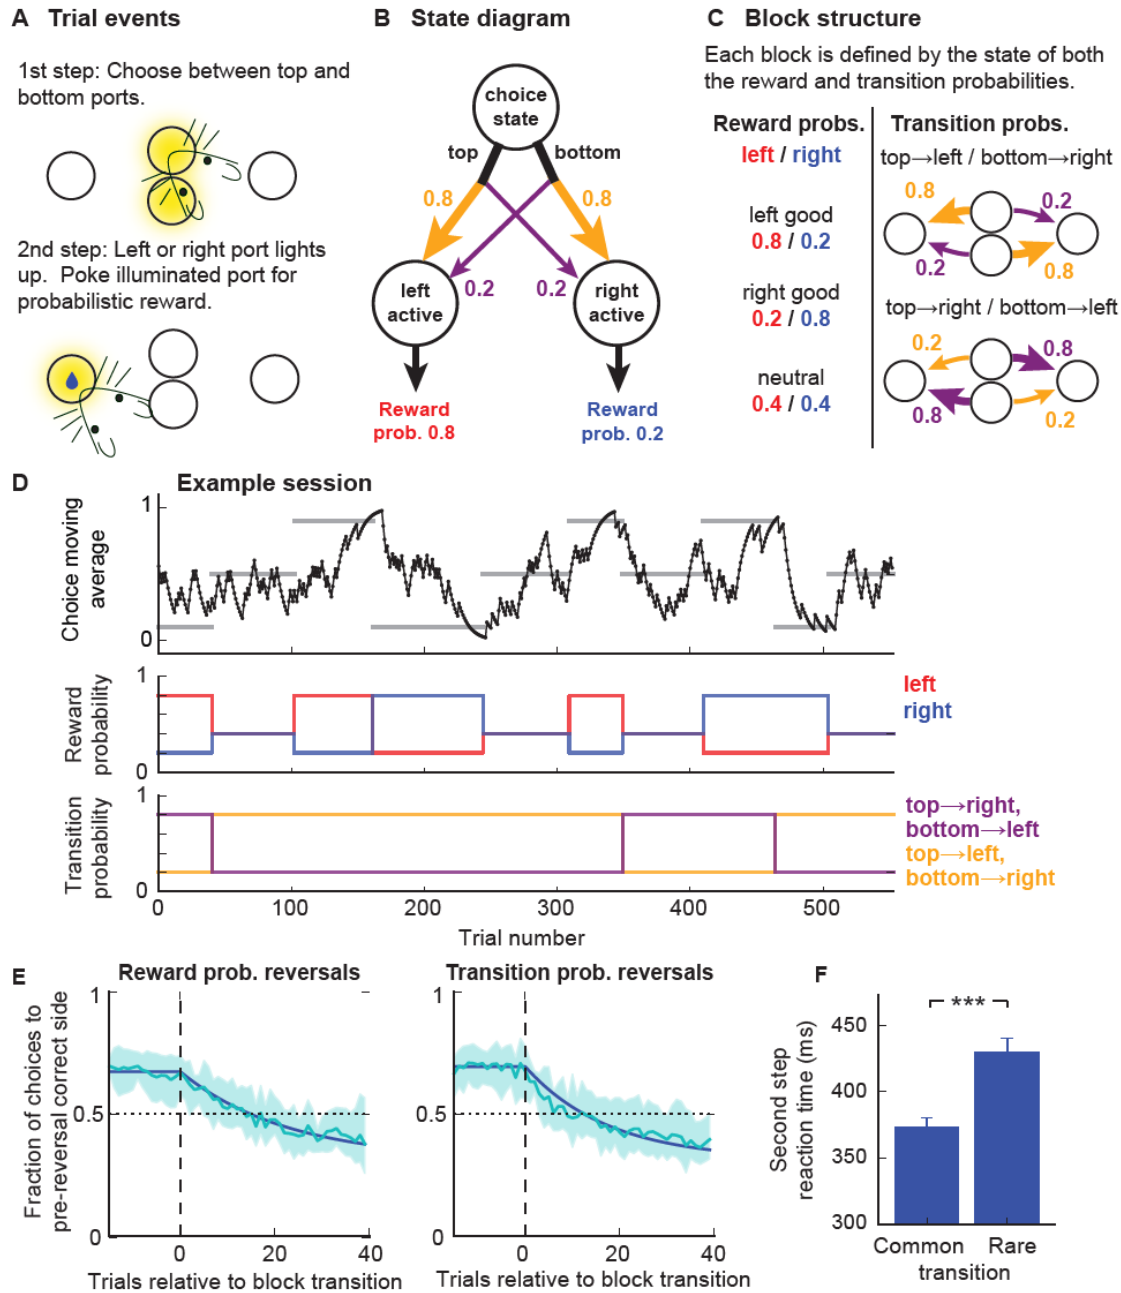

**Figure 1. Two-step task with transition probability reversals** **A)** Diagram of apparatus and trial events. **B)** State diagram of task. Reward and transition probabilities are indicated for one of the six possible block types. **C)** Block structure, left side shows the three possible states of the reward probabilities, right side shows the two possible states of the transition probabilities. **D)** Example session: Top panel - Exponential moving average ( $\tau = 8$  trials) of choices. Horizontal grey bars show blocks, with correct choice (top, bottom or neutral) indicated by y position of bars. Middle panel - reward probabilities in left-active (red) and right-active (blue) states. Bottom panel - Transition probabilities linking first-step actions (top, bottom pokes) to second step states (left/right active). **E)** Choice probability trajectories around reversals. Pale blue line - average trajectory, dark blue line - exponential fit, shaded area - cross-subject standard deviation. Left panel - reversals in reward probability, right panel - reversals in transition probabilities. **F)** Second step reaction times following common and rare transitions - i.e. the time between the first step choice and side poke entry. \*\*\* indicates  $P < 0.001$ . Error bars show cross-subject SEM.

## 95 Results:

### 96 *A novel two-step task with transition probability reversals*

97 As in the original two-step task (Daw et al., 2011), our task consisted of a choice between two ‘first-  
98 step’ actions which led probabilistically to one of two ‘second-step’ states where reward could be  
99 obtained. Unlike the original task, in each second-step state there was a single action rather than a  
100 choice between two actions. In the original task, the stochasticity of state transitions and reward  
101 probabilities causes both model-based and model-free control to obtain rewards at a rate negligibly  
102 different from random choice at the first-step (Akam et al., 2015; Kool et al., 2016). To promote task  
103 engagement, we increased the contrast between good and bad options by using a block-based reward  
104 probability distribution rather than the random walks used in the original, and increased the  
105 probability of common relative to rare state transitions. The final and most significant structural  
106 change was the introduction of reversals in the transition probabilities mapping the first-step actions  
107 to the second-step states. This was done to prevent habit like strategies consisting of mappings from  
108 the second-step state where rewards have recently been obtained to specific actions at the first step  
109 (Akam et al., 2015). In supplementary results we directly compare versions of the task with fixed and  
110 changing action-state transition probabilities (Figure S1); subject’s behaviour was radically different in  
111 each, suggesting that they recruit different behavioural strategies.

112 We implemented the task using a set of four nose-poke ports: top and bottom ports in the centre,  
113 flanked by left and right ports (Figure 1A). Each trial started with the central ports lighting up,  
114 requiring a choice between top and bottom ports. The choice of a central port led probabilistically to  
115 a ‘left-active’ or ‘right-active’ state, in which respectively the left or right port was illuminated. The  
116 subject then poked the illuminated left or right side port to gain a probabilistic water reward (Figure  
117 1A,B). A 1 second inter-trial interval started when the subject exited the side port.

118 Both the transition probabilities linking the first-step actions to the second-step states, and the reward  
119 probabilities in each second-step state, changed in blocks. There were three possible states of the  
120 reward probabilities for the *left/right* ports: respectively *good/bad*, *neutral/neutral* and *bad/good*  
121 (Figure 1C), where *good/neutral/bad* reward probabilities were 0.8/0.4/0.2. There were two possible  
122 states of the transition probabilities: *top → left / bottom → right* and *top → right / bottom → left*  
123 (Figure 1C), where e.g. *top → right* indicates the top port commonly (0.8 of trials) lead to the right port  
124 and rarely (0.2 of trials) to the left port (Figure 1C). At block transitions, the reward and/or transition  
125 probabilities changed (see figure S2 for block transition structure). Reversals in which first-step action  
126 (top or bottom) had higher reward probability could therefore occur due to reversals in either the  
127 reward or transition probabilities. Block transitions were triggered when an exponential moving

128 average ( $\tau = 8$  trials) of the proportion of correct choices reached a threshold of 0.75, with a delay  
129 of 20 trials between threshold crossing and the reversal occurring to allow an unbiased assessment of  
130 performance at the end of blocks. This resulted in block lengths of  $63.6 \pm 31.7$  (mean  $\pm$  SD) trials.

131 Subjects learned the task in 3 weeks with minimal shaping and performed an average of  $576 \pm 174$   
132 (mean  $\pm$  SD) trials per day thereafter. Our behavioural dataset used data from day 22 of training  
133 onward ( $n=17$  mice, 400 sessions). Subjects tracked which first-step action had higher reward  
134 probability (Figure 1D,E), choosing the correct option at the end of non-neutral blocks with probability  
135  $0.68 \pm 0.03$  (mean  $\pm$  SD). Choice probabilities adapted faster following reversals in the action-state  
136 transition probabilities (exponential fit  $\tau = 17.6$  trials), compared with reversals in the reward  
137 probabilities ( $\tau = 22.7$  trials,  $P = 0.009$ , bootstrap test, Figure 1E). Reaction times to enter the second  
138 step port were faster following common than rare transitions ( $P = 2.8 \times 10^{-8}$ , paired t-test) (Figure 1F).

#### 139 *Disambiguating model-based and model-free strategies in the two-step task with transition* 140 *probability reversals*

141 To dissociate the contribution of model-based and model-free RL to subjects' behaviour we looked at  
142 the granular structure of how events on each trial affected subsequent choices. The simplest such  
143 analysis examines the so-called stay probabilities of repeating the first-step choice for the four  
144 possible combinations of transition (common or rare) and outcome (rewarded or not) (Figure 2A,B).  
145 We quantified how the state transition, trial outcome, and their interaction predicted stay probability  
146 using a logistic regression analysis, with additional predictors to capture choice bias and correct for  
147 cross trial correlations which can otherwise give a misleading picture of how trial events influence  
148 subsequent choice (Akam et al., 2015). Positive loading on the outcome predictor indicated that  
149 receiving reward was reinforcing (i.e. predicted staying) ( $P < 0.001$ , bootstrap test). Positive loading  
150 on the transition predictor indicated that experiencing common transitions was also reinforcing ( $P <$   
151  $0.001$ ). Loading on the transition-outcome interaction predictor was not significantly different from  
152 zero ( $P = 0.79$ ).

153 The absence of a transition-outcome interaction has been used in the original two-step task (Daw  
154 2011) to suggest that behaviour is model-free. However, we have shown (Akam et al. 2015) that this  
155 depends on the subjects not learning the transition probabilities from the experienced transitions.  
156 Such fixedness is reasonable for the original task, where transition probabilities are fixed and known  
157 to be so by the human subjects, but not for the task described here. Our analysis (Akam et al. 2015)  
158 suggests that when model-learning is included, loading in the logistic regression analysis for a model-  
159 based strategy decreases for the interaction predictor and increases for the outcome and transition  
160 predictors.

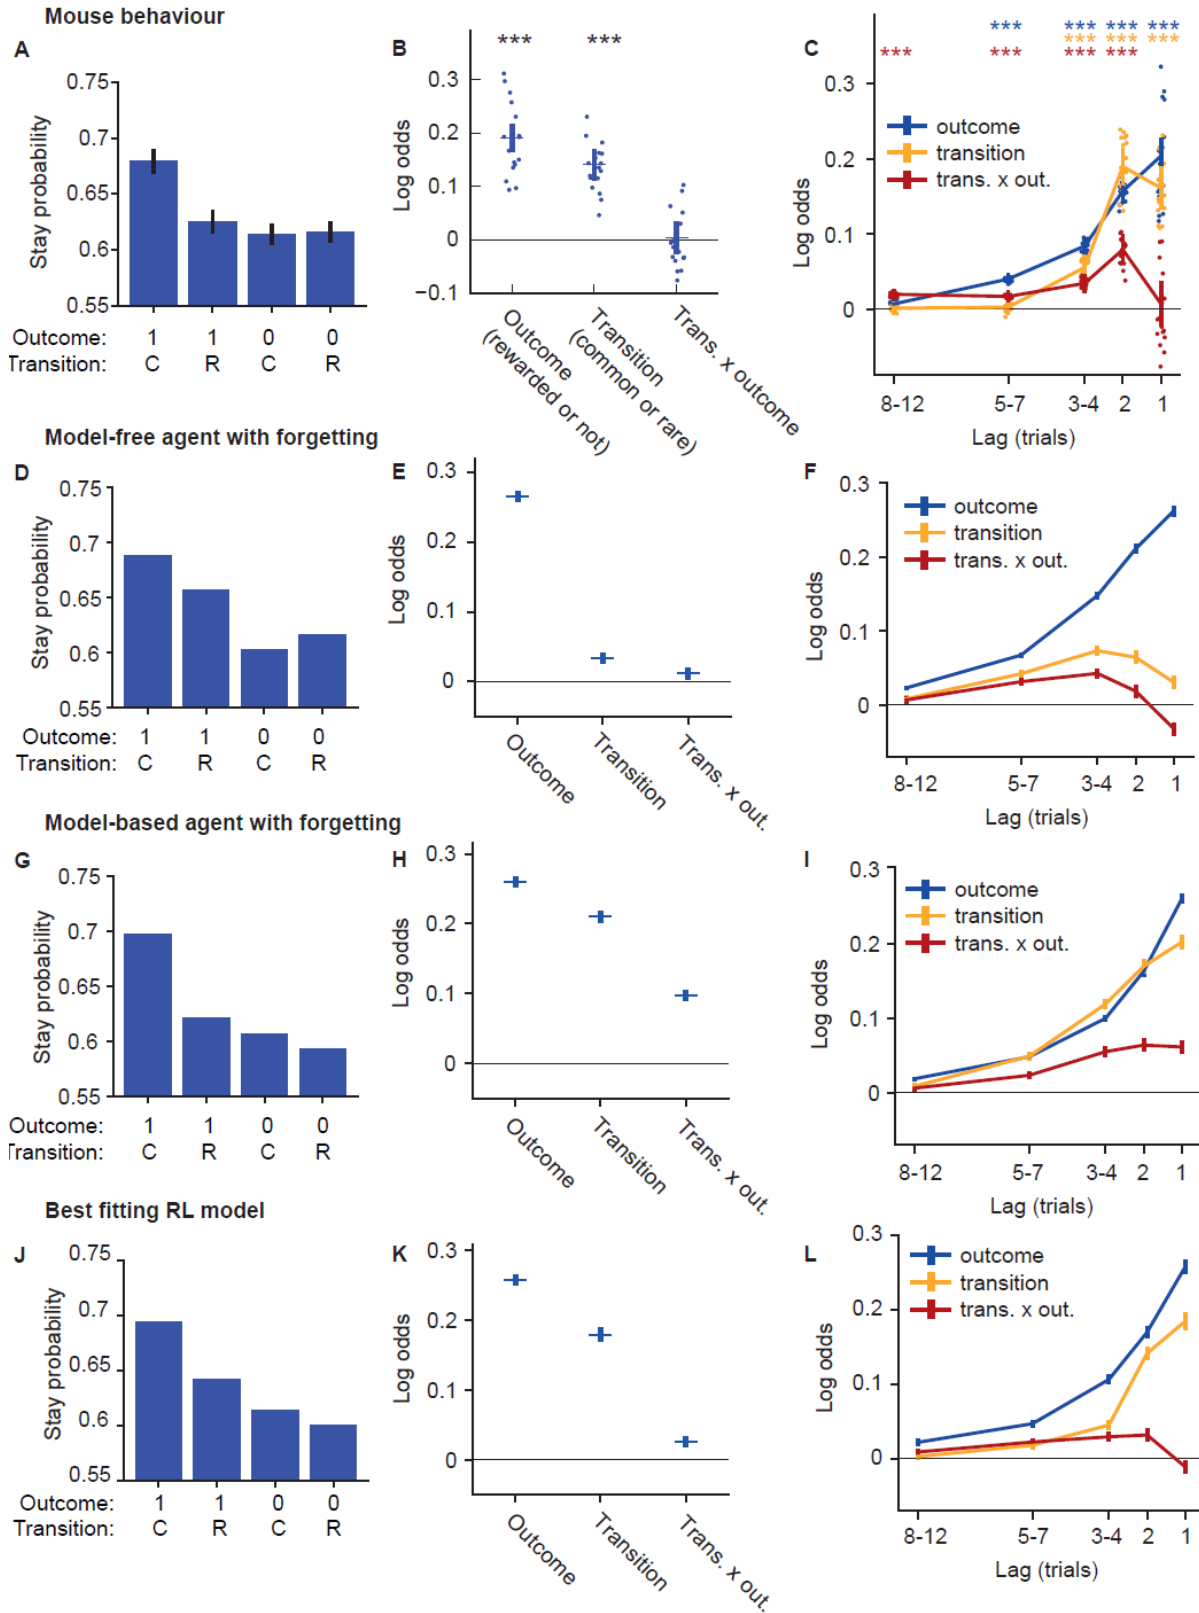

**Figure 2. Stay probability and logistic regression analyses.** A-C) Mouse behaviour. **A)** Stay probability analysis showing the fraction of trials the subject repeated the same choice following each combination of trial outcome (rewarded (1) or not (0)) and transition (common (C) or rare (R)). Error bars show cross-subject SEM. **B)** Logistic regression model fit predicting choice as a function of the previous trial's events. Predictor loadings plotted are; *outcome* (repeat choices following rewards), *transition* (repeat choices following common



transitions) and *transition-outcome interaction* (repeat choices following rewarded common transition trials and non-rewarded rare transition trials). Error bars indicate 95% confidence intervals on the population mean, dots indicate maximum a posteriori (MAP) subject fits. **C**) Lagged logistic regression model predicting choice as a function of events over the previous 12 trials. Predictors are as in **B**. **D-F**) As **A-C** but for data simulated from a model-free RL agent with forgetting and multi-trial perseveration. **G-I**) As **A-C** but for data simulated from a model-based RL agent with forgetting and multi-trial perseveration. Parameters for RL model simulations were obtained by fits of the RL models to the mouse behavioural data

---

161 To understand the implications of this for our task better, we simulated the behaviour of a model-  
162 based and a model-free RL agent, with the parameters of both fit to the behavioural data, and ran the  
163 logistic regression analysis on data simulated from both models (Figure 2D-I). The RL agents used in  
164 these simulations included forgetting about actions not taken and states not visited, as RL model  
165 comparison indicated this greatly improved fits to mouse behaviour (see below & supplementary  
166 results). Data simulated from a model-free agent showed a large loading on the outcome predictor  
167 (i.e. rewards were reinforcing), but little loading on the transition predictor or transition-outcome  
168 interaction predictors (Figure 2E). By contrast, data simulated from the model-based agent showed a  
169 large loading on both outcome and transition predictors (i.e. both rewards and common transitions  
170 were reinforcing) (Figure 2H), and a smaller loading on the interaction predictor. Therefore, in our  
171 data the transition predictor loaded closer to the model-based strategy and the interaction predictor  
172 loaded closer to the model-free strategy.

173 The above analysis only considers the influence of the most recent trial's events on choice. However,  
174 the slow time course of adaptation to reversals (Figure 1E) indicates that choices must be influenced  
175 by a longer trial history. To better understand these long-lasting effects, we used a lagged regression  
176 analysis assessing how the current choice was influenced by past transitions, outcomes and their  
177 interaction (Figure 2C). Predictors were coded such that a positive loading on e.g. the outcome  
178 predictor at lag  $x$  indicates that reward on trial  $t$  increased the probability of repeating the trial  $t$   
179 choice at trial  $t + x$ . Past outcomes significantly influenced current choice up to lags of 7 trials, with  
180 a smoothly decreasing influence at larger lags. Past state transitions influenced the current choice up  
181 to lags of 4 trials with, unexpectedly, a somewhat larger influence at lag 2 compared to lag 1. Also  
182 unexpectedly, although the transition-outcome interaction on the previous trial did not significantly  
183 influence the current choice, the interaction at lag 2 and earlier did, with the strongest effect at lag 2.

184 To understand how these patterns relate to RL strategy, we analysed the behaviour of model-based  
185 and model-free agents using the lagged regression (Figure 2F,I). Both strategies showed a smoothly  
186 decreasing influence of trial outcome with increasing lag, similar to that observed in the data. Both  
187 strategies showed a positive loading on the transition predictor across the trial history, but this was  
188 much stronger at recent trials for the model-based strategy, similar to that observed in the data,  
189 though with a more gradual decay with increasing lag. Both strategies showed a positive loading on



190 the transition outcome interaction predictor for earlier trials but diverged at recent trials, with the  
191 model-based strategy showing a small positive loading and the model-free a small negative loading.  
192 These data suggest that the strong influence of recent common/rare state transitions in the mouse  
193 behaviour is not consistent with a model-free strategy, however the mouse behaviour does not look  
194 like a simple mixture of model-based and model-free, suggesting the presence of additional features.  
195 To understand how behaviour diverged from these models, we performed an in-depth model  
196 comparison, detailed in supplementary results. Here, we summarise the principal findings. As with  
197 human behaviour on the original task, the best fitting model used a mixture of model-based and  
198 model-free control. However, model comparison indicated additional features not typically used in  
199 models of two-step task behaviour: forgetting about values and state transitions for not-chosen  
200 actions, perseveration effects spanning multiple trials, and representation of actions both at the level  
201 of the choice they represent (e.g. top port) and the motor action they require (e.g. left port→top  
202 port). These are discussed in detail in the supplementary results. Taken together, the additional  
203 features substantially improved fit quality ( $\Delta$  iBIC = 11018) over the model which lacked them (Figure  
204 S3). Data simulated from the best fitting RL model better matched mouse behaviour (Figure 2 J-L),  
205 with positive loading on the outcome and transition predictors and minimal loading on the interaction  
206 predictor (Figure 2J) at trial -1, but positive loading on the interaction predictor at trial -2 and earlier  
207 (Figure 2L).

208 These data indicate that the novel task recruits both model-based and model-free reinforcement  
209 learning mechanisms, providing a tool for mechanistic investigation into more cognitive aspects of  
210 decision making in the mouse.

#### 211 *ACC activity represents all trial events, emphasises choices and states, contextualises rewards*

212 To understand how ACC represented two-step task behaviour, we expressed GCaMP6f in ACC neurons  
213 under the CaMKII promotor (to target pyramidal neurons) and imaged calcium activity through a  
214 gradient refractive index (GRIN) lens using a miniature fluorescence microscope (n=4 mice, 21  
215 sessions, 2385 neurons) (Ghosh et al., 2011). Constrained non-negative matrix factorisation for  
216 endoscope data (CNMF-E) (Zhou et al., 2018) was used to extract activity traces for individual neuron  
217 from the microscope video (Figure 3B). All subsequent analyses used the deconvolved activity inferred  
218 by CNMF-E. Activity was sparse, with an average event rate of 0.12Hz across the recorded population  
219 (Figure 3C). We aligned activity to the same events across trials by time-warping (see Methods) the  
220 interval between the first-step choice and second-step port entry (labelled 'outcome' in figures as this  
221 is when outcome information becomes available) to match the median interval. Activity prior to  
222 choice and following outcome was not time-warped. Different populations of neurons participated at

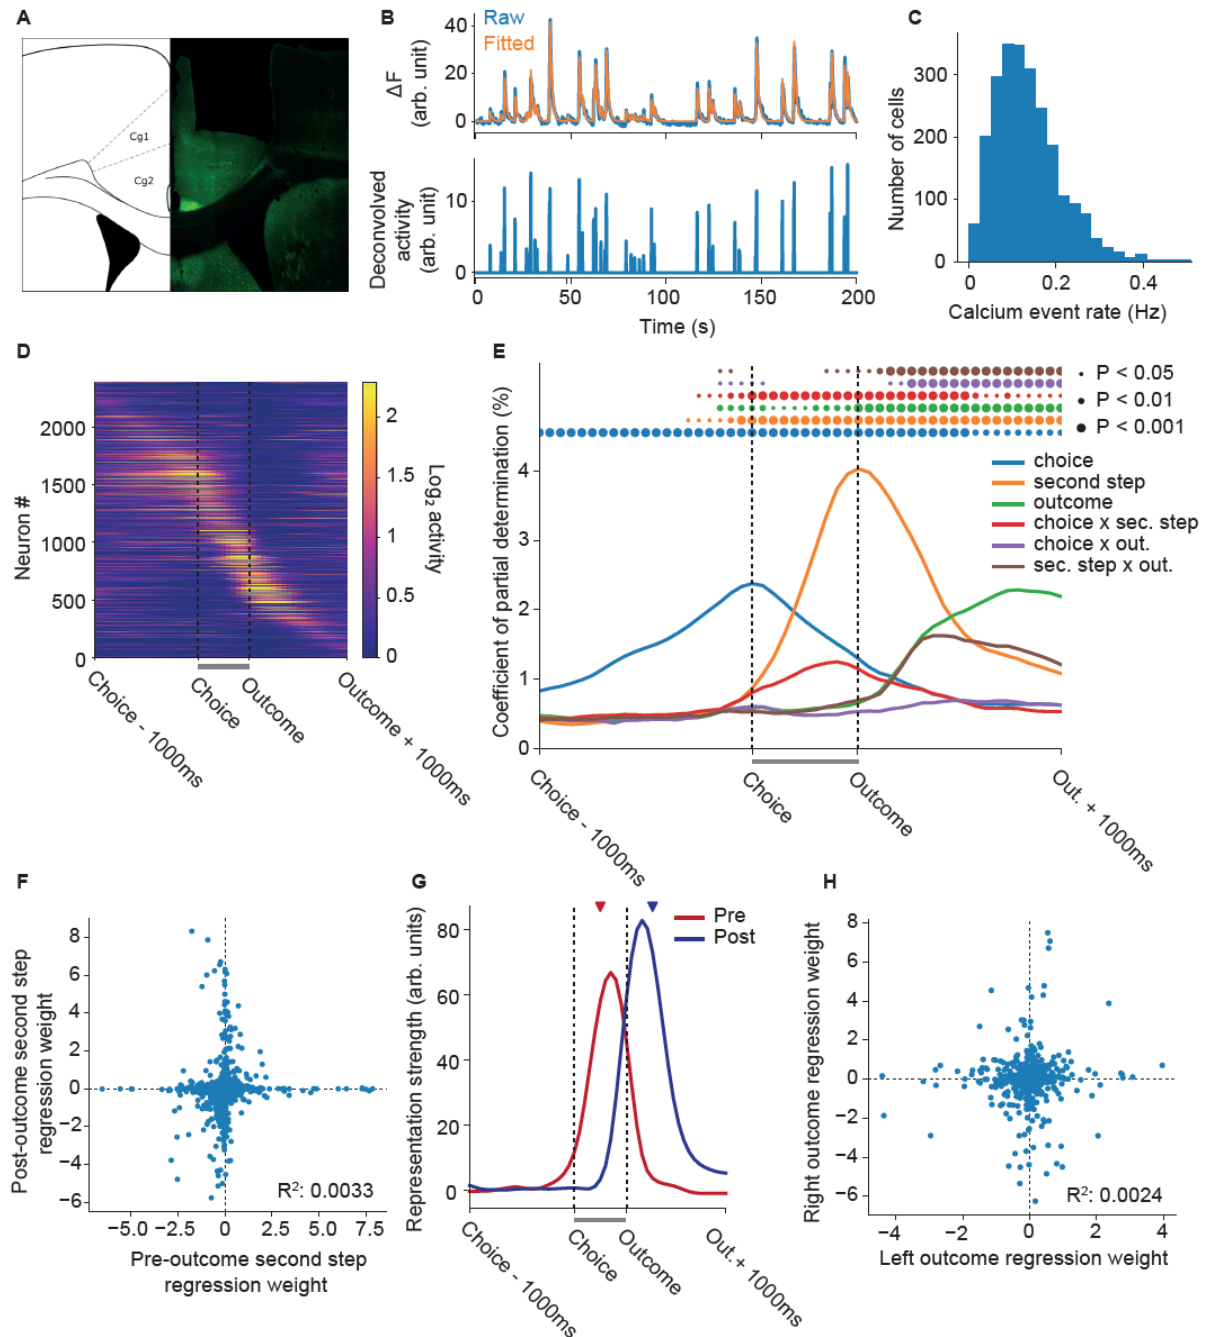

**Figure 3. Two-step ACC calcium imaging.** **A)** Example GRIN lens placement in ACC. **B)** Fluorescence signal from a neuronal ROI identified by CNMF-E (top panel – blue) and fitted trace (orange) due to the inferred deconvolved neuronal activity (bottom panel). **C)** Histogram showing the distribution of average event rates across the population of recorded neurons. Events were defined as any video frame on which the inferred activity was non-zero. **D)** Average trial aligned activity for all recorded neurons, sorted by the time of peak activity. No normalisation was applied to the activity. The grey bars under **D**, **E**, **G** between choice and outcome indicate the time period that was warped to align trials of different duration. **E)** Regression analysis predicting activity on each trial from a set of predictors coding the *choice* (top or bottom), *second step* (left or right), *outcome* (rewarded or not) that occurred on each trial, and their interactions. Lines show the population coefficient of partial determination (CPD) as a function of time relative to trial events. Circles indicate where CPD is significantly higher than expected by chance, assessed by permutation test with Benjamini–Hochberg correction for comparison at multiple time points. **F)** Representation of the second-step state before and after the trial outcome. Points show *second step* predictor loadings for individual neurons at a time-point halfway between choice and outcome (x-axis) and a time-point 250ms after trial outcome (y-axis).

axis). **G)** Time-course of pre- and post-outcome representations of second step state, obtained by projecting the second step predictor loadings at each time-point onto the pre- and post-outcome second step representations. The red and blue triangles indicate the timepoints used to define the projection vectors. **H)** Representation of trial outcomes (reward or not) obtained at the left and right poke. Points show predictor loadings for individual neurons 250ms after trial outcome in a regression analysis where outcomes at the left and right poke were coded by separate predictors.

---

223 different time-points across the trial (Figure 3D). Many ACC neurons ramped up activity over the  
224 1000ms preceding the first step-choice, peaking at choice time and being largely silent following trial  
225 outcome. Other neurons were active in the period between choice and outcome, and yet others were  
226 active immediately following trial outcome.

227 To identify how activity represented events on the current trial, we used a linear regression predicting  
228 the activity of each neuron at each time-point as a function of the choice (top or bottom), second-step  
229 state (left or right) and outcome (rewarded or not) that occurred on the trial, as well as the interactions  
230 between these events. This and later analyses only included sessions where we had sufficient  
231 coverage of all trial types ( $n=3$  mice, 11 sessions, 1314 neurons), as in some imaging sessions with few  
232 blocks and trials there was no coverage of trial types that occur infrequently in those blocks. We  
233 evaluated the population coefficient of partial determination, i.e. the fraction of variance across the  
234 population uniquely explained by each predictor, as a function of time relative to trial events (Figure  
235 3E). Representation of choice ramped up smoothly over the second preceding the choice, then  
236 decayed smoothly until approximately 500ms after trial outcome. Representation of second-step  
237 state increased rapidly following the choice, peaked at second-step port entry, then decayed over the  
238 second following the outcome, and was the strongest represented trial event.

239 As largely distinct populations of neurons were active before and after trial outcome (Figure 3D), we  
240 asked whether the representation of second-step state was different at these two time-points by  
241 plotting the second-step state regression weights for each neuron at a time-point mid-way between  
242 choice and outcome (which we term the pre-outcome representation of second step state) against  
243 the weights 250ms after outcome (the post-outcome representation) (Figure 3F). These pre- and post-  
244 outcome representations were uncorrelated ( $R^2 = 0.0033$ ), and neurons that were strongly tuned at  
245 one time point typically had little selectivity at the other, indicating that although second-step state  
246 was strongly represented at both times, the representations were orthogonal and involved different  
247 populations of neurons. To assess how these two representations evolved over time, we projected  
248 the regression weights for second-step state at each time-point onto the pre- and post- outcome  
249 second-step representations - i.e. onto the regression weights for second step state at these two  
250 timepoints (Figure 3G), using cross validation to give an unbiased time-course estimates. The pre-  
251 outcome representation of second step state peaked shortly before second-step port entry and

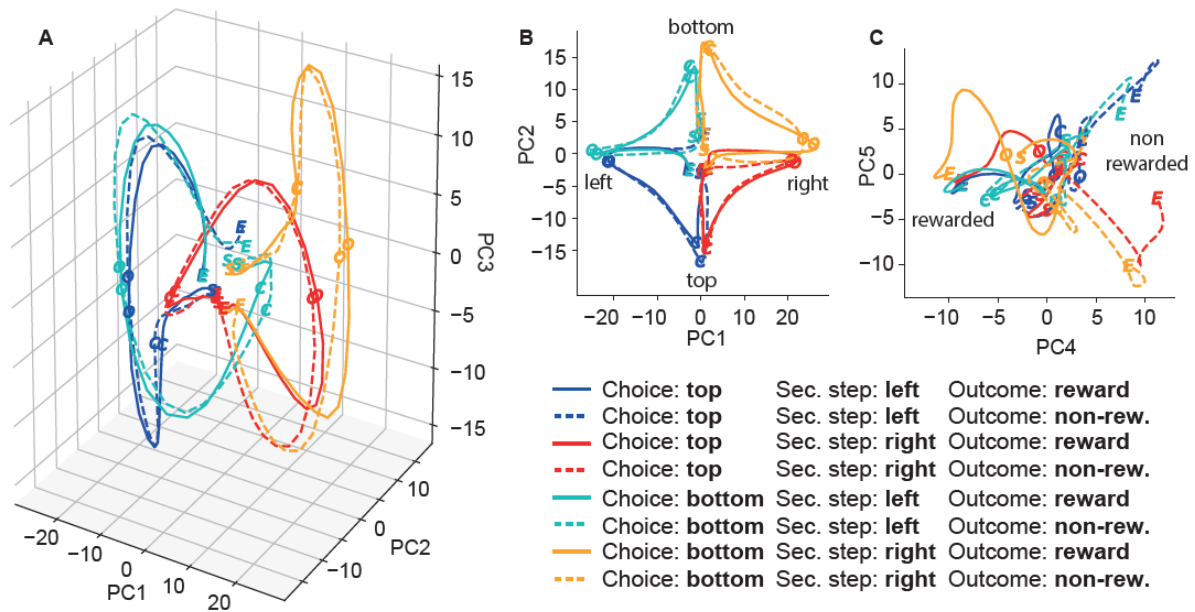

**Figure 4. Population activity trajectories.** Projection of the average population activity for different trial types into the low dimensional space which captures the most variance between trial types. Trial types were defined by the 8 combinations of choice, second-step and trial outcome. Letters on the trajectories indicate the trajectory start (*S* - 1000ms before choice), the choice (*C*), outcome (*O*) and trajectory end (*E* - 1000ms after outcome). **A**) 3D plot showing projections onto first 3 principal components. **B**) Projection onto PCs 1 and 2 which represent second-step and choice respectively. **C**) Projection onto PCs 4 and 5 which differentiate trial outcomes.

252 decayed rapidly afterwards, while the post outcome representation peaked shortly after trial outcome  
 253 and persisted for ~500ms.

254 Representation of the trial outcome ramped up following receipt of outcome information (Figure 3E),  
 255 accompanied by an initially equally strong representation of the interaction between trial outcome  
 256 and second-step state. This interaction indicates that the representation of trial outcome depended  
 257 strongly on the state in which the outcome was received. To assess this in more detail we ran a version  
 258 of the regression analysis with separate predictors for outcomes received at the left and right ports,  
 259 and plotted the left and right outcome regression weights 250ms after outcome against each other  
 260 (Figure 3H). Representations of trial outcome obtained at the left and right port were orthogonal ( $R^2$   
 261 = 0.0024), indicating that although ACC carried information about reward, reward representations  
 262 were specific to the state where the reward was received.

263 The evolving representation of trial events can be visualised by projecting the average neuronal  
 264 activity for each trial type (defined by choice, second-step state and outcome) into the low  
 265 dimensional space which captures the greatest variance between different trial types (see methods)  
 266 (Figure 4). The first 3 principal components (PCs) of this space were dominated by representation of  
 267 choice and second-step state (Figure 4A,B), with different trial outcomes being most strongly

268 differentiated in PCs 4 and 5 (Figure 4C). Prior to the choice, trajectories diverged along an axis  
269 capturing choice selectivity (PC2). Following the choice, trajectories for different second-step states  
270 diverged first along one axis (PC3) then along a second axis (PC1), confirming that two orthogonal  
271 representations of second-step state occur in a sequence spanning the time period from choice  
272 through trial outcome.

### 273 *ACC represents model-based decision variables*

274 Model-based reinforcement learning uses predictions of the specific consequences of action, i.e. the  
275 states that actions lead to, to compute their values. Therefore if ACC implements model-based  
276 computations on this task, we expect to see representation of the current state of the transition  
277 probabilities linking first-step actions second-step states, predictions of the second-step state that will  
278 be reached given the chosen action, and surprise signals if the state that is actually reached does not  
279 match these expectations.

280 We therefore asked how ACC activity was affected by the changing transition probabilities mapping  
281 the first-step actions to second-step states, and reward probabilities in the second-step states. Due  
282 to the limited number of blocks that subjects performed in imaging sessions, we performed separate  
283 regression analyses for sessions where we have sufficient coverage of the different states of the  
284 transition probabilities (Figure 5A, n=3 mice, 5 sessions, 589 neurons) and reward probabilities (Figure  
285 5B, n=3 mice, 10 sessions, 1152 neurons). These analyses predicted neuronal activity as a function of  
286 events on the current trial, the state of the transition or reward probabilities respectively, and their  
287 interactions. Though each analysis used only a subsets of imaging sessions, the representation of  
288 current trial events (Figure 5A,B top panels) was in both cases very similar to that for the full dataset  
289 (Figure 3E). As both the transition and reward probabilities determine which first step action is  
290 correct, effects common to these two analyses could in principle be mediated by changes in first-step  
291 action values rather than the reward or transition probabilities themselves, but effects that are  
292 specific to one or other analysis cannot.

293 Representation of the current state of the transition probabilities (Figure 5A: cyan), but not reward  
294 probabilities (Figure 5B: cyan), ramped up prior to choice and was sustained through trial outcome,  
295 though was only significant in the pre-choice period. Representation of the predicted second-step  
296 state given the current choice (the interaction of the choice on the current trial with the state of the  
297 transition probabilities) also ramped up prior to choice (Figure 5A: grey), peaking around choice time.  
298 Though ACC represented the interaction of choice with the reward probabilities (Figure 5B: grey), the  
299 time course was different, with weak representation prior to choice and a peak shortly before trial  
300 outcome.

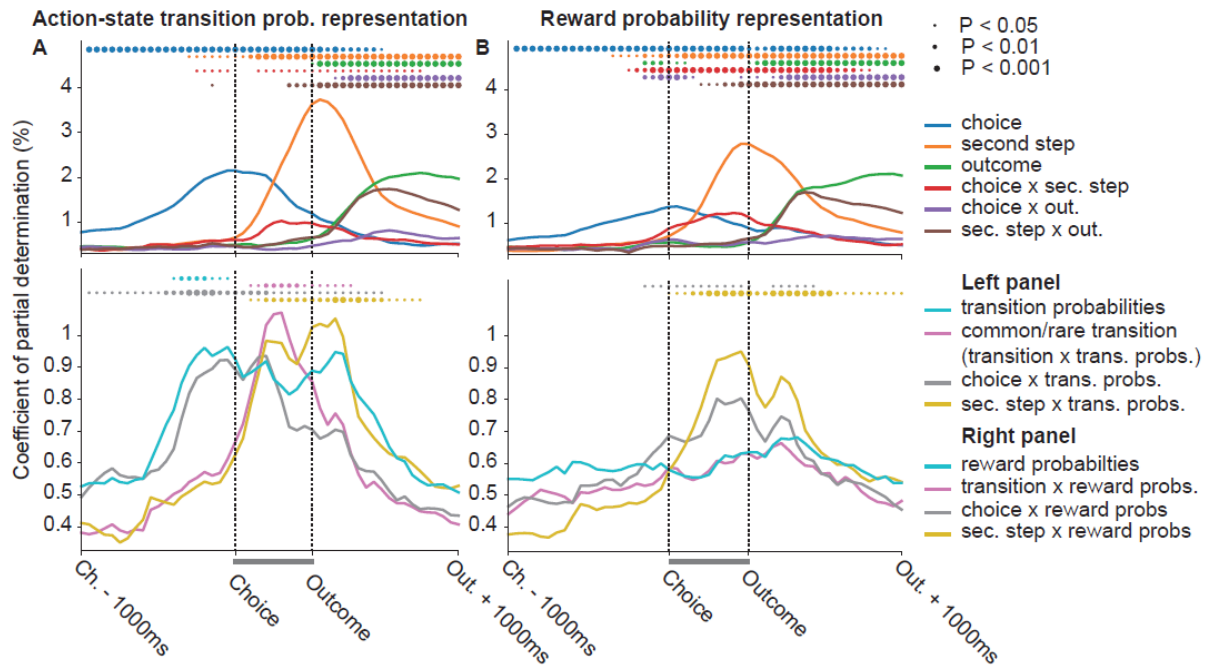

**Figure 5. ACC represents model-based decision variables. A)** Regression analysis predicting neuronal activity as a function of events on the current trial (top panel) and their interaction with the transition probabilities mapping the first-step choice to second-step states (bottom panel) for a subset of sessions with sufficient coverage of both states of the transition probabilities. Predictors plotted in top panels are as in figure 3E. Predictors plotted in the bottom panel are; *transition probabilities*: which of the two possible states the transition probabilities are in (see Fig. 1C), *common/rare transition*: whether the transition on the current trial was common or rare, i.e. the interaction of the transition on the current trial (e.g. top→right) with the state of the transition probabilities, *choice x trans. probs.*: the choice on the current trial interacted with the state of the transition probabilities – i.e. the predicted second-step state given the current choice, *sec. step x trans. probs.*: the second-step state reached on the current trial interacted with the state of the transition probabilities, i.e. the action which commonly leads to the second step state reached. Predictors shown in top and bottom panels of **A** were run as a single regression but plotted on separate axes for clarity. The grey bars between choice and outcome indicate the time period that was warped to align trials of different length. **B)** Regression analysis predicting neuronal activity as a function of events on the current trial (top panel) and their interaction with the reward probabilities in the second-step states (bottom panel) for a subset of sessions with sufficient coverage of different states of the reward probabilities. Predictors plotted in the bottom panel are; *reward probabilities*: which of the three possible states the transition probabilities are in (see Fig. 1C), *transition x reward probs*: Interaction of the transition on the current trial with the state of the reward probabilities. *choice x reward probs.*: the choice on the current trial interacted with the state of the reward probabilities, *sec. step x trans. probs.*: the second-step state reached on the current trial interacted with the state of the rewarded probabilities, i.e. the expected outcome (rewarded or not). Predictors shown in top and bottom panels of **B** were run as a single regression but plotted on separate axes for clarity.

301 Once the second-step state was revealed, ACC represented whether the transition was common or  
 302 rare - i.e. the interaction of the transition on the current trial with the state of the transition  
 303 probabilities (Figure 5A: magenta). There was no representation of the equivalent interaction of the  
 304 transition on the current trial with the state of the reward probabilities (Figure 5B: magenta). Finally,  
 305 ACC represented the interaction of the second-step state reached on the current trial with both the  
 306 transition and reward probabilities, with both representations ramping up after the second-step state  
 307 was revealed and persisting till after trial outcome (Figure 5 A,B: yellow). The interaction of second-



308 step state with the transition probabilities corresponds to the action which commonly leads to the  
309 second-step state reached, potentially providing a substrate for model-based credit assignment. The  
310 interaction of second-step state with the reward probabilities corresponds to the predicted trial  
311 outcome (rewarded or not).

312 These data indicate that ACC represented a set of decision variables required for model-based RL,  
313 including the current action-state transition structure, the predicted state given chosen action, and  
314 whether the observed state transition was expected or surprising.

### 315 *Single-Trial Optogenetic Inhibition of Anterior Cingulate impairs model-based RL*

316 To test the causal role of ACC in two-step task behaviour we silenced ACC neurons on individual trials  
317 using JAWS (Chuong et al., 2014). An AAV viral vector expressing JAWS-GFP under the CaMKII  
318 promoter was injected bilaterally into ACC of experimental animals (n = 11 mice, 192 sessions) (Figure  
319 S4), while GFP was expressed in control animals (n = 12 mice, 197 sessions). A red LED was chronically  
320 implanted above the cortical surface (Figure 6A). Electrophysiology confirmed that red light (50mW,  
321 630nm) from the implanted LED robustly inhibited ACC neurons (Figure 6B, Kruskal-Wallis  $P < 0.05$  for  
322 67/249 recorded cells). ACC neurons were inhibited on a randomly selected 1/6 trials, with a minimum  
323 of two non-stimulated trials between each stimulation. Light was delivered from the time when the  
324 subject entered the side port and received the trial outcome until the time of the subsequent choice  
325 (Figure 6C).

326 ACC inhibition reduced the influence of the state transition (common or rare) on the subsequent  
327 choice ( $P = 0.007$  Bonferroni corrected for comparison of 3 predictors, stimulation by group  
328 interaction  $P = 0.029$ , permutation test) (Figure 6D, S5A). Stimulation did not affect how either the  
329 trial outcome ( $P = 0.94$  uncorrected), nor the transition-outcome interaction ( $P = 0.90$  uncorrected)  
330 influenced the subsequent choice. In both experimental and control groups, light stimulation  
331 produced a bias towards the top poke, potentially reflecting an orienting response (bias predictor  $P <$   
332  $0.001$  uncorrected). Reaction times were not affected by light in either group (Paired t-test  $P > 0.36$ ).

333 The selective impairment of the influence of action-state transition on subsequent choice, while  
334 sparing the influence of the trial outcome, is consistent with disrupted model-based control, as the  
335 transition predictor most strongly differentiates these two strategies (Figure 2). Consistent with this,  
336 the effect of inhibition on the transition predictor in each subject was strongly correlated with the  
337 strength of model-based influence on that subject's choices (Figure 6E,  $R = -0.91$ ,  $P = 0.0001$ ), as  
338 assessed by fitting the RL model to subject's behaviour in the inhibition sessions using a single set of  
339 parameters for all trials. Additional control analyses presented in supplementary results rule out an  
340 interpretation of the inhibition effect on the transition predictor in terms of motor level variables.



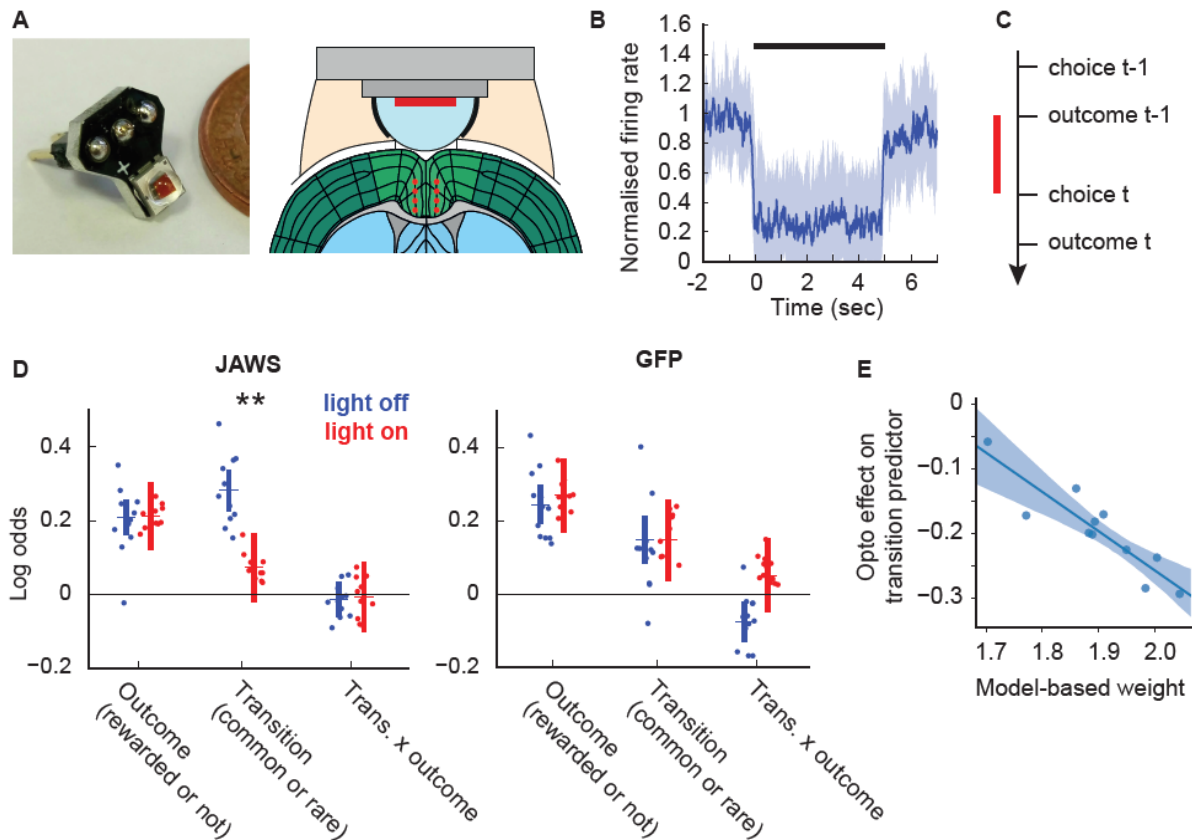

**Figure 6. Optogenetic inhibition of ACC in the two-step task.** **A)** LED implant (left) and diagram showing implant mounted on head (right), red dots on diagram indicate location of virus injections. **B)** Normalised firing rate for significantly inhibited cells over 5 second illumination, dark blue line – median, shaded area 25 – 75 percentiles **C)** Timing of stimulation relative to trial events. Stimulation was delivered from trial outcome to subsequent choice. **D)** Logistic regression analysis of ACC inhibition data showing loadings for the outcome, transition and transition-outcome interaction predictors for choices made on stimulated (red) and non-stimulated (blue) trials. \*\* indicates Bonferoni corrected  $P < 0.01$  between stimulated and non-stimulated trials. **E)** Correlation across subjects between the strength of model-based influence on choice (assessed using the RL model's model-based weight parameter  $G_{mb}$ ) and the effect of optogenetic inhibition on the logistic regression model's transition predictor.

341 If ACC causally mediates model-based but not model-free RL, inhibiting ACC in a task where these  
 342 strategies give similar recommendations should have little effect. To test this, we performed the same  
 343 ACC manipulation in a probabilistic reversal learning task, where model-based and model-free RL are  
 344 expected to generate qualitatively similar behaviour (supplementary results, Figure S6). ACC  
 345 inhibition produced only a very subtle (but significant) reduction in the influence of the most recent  
 346 outcome on the subsequent choice, suggesting that in this simpler task where model-based and  
 347 model-free RL both recommend repeating rewarded choices, other regions could largely compensate  
 348 for ACC inhibition.

## 349 Discussion:

350 We developed a novel two-step decision task for mice with reversals in the transition probabilities,  
351 designed to dissociate model-based and model free RL while rendering nugatory strategies based on  
352 latent-state inference. A detailed characterisation of subjects' behaviour indicated that using this task  
353 we could quantify the usage of model-based and model-free RL in each subject. Calcium imaging  
354 indicated that different populations of ACC neurons represented each stage of the trial, with ramping  
355 choice selective activity followed by an evolving representation of the state reached and trial  
356 outcome. Representation of trial outcome (rewarded or not) was weaker than that of the state where  
357 the outcome was obtained, and different populations of neurons represented trial outcome in  
358 different states. ACC neurons represented a set of model-based decision variables, including the  
359 current action-state transition structure, the state predicted given the chosen action, and whether  
360 state transitions were expected or surprising. Consistent with this, optogenetic inhibition of ACC on  
361 individual trials reduced the influence of action-state transitions on subsequent choice, without  
362 affecting the influence of rewards. The strength of this inhibition effect strongly correlated across  
363 subjects with their use of model-based RL. These data demonstrate a role for ACC in model-based  
364 action selection.

365 Our study is one of several recent adaptations of two-step tasks for animal models (Miller et al., 2017;  
366 Dezfouli and Balleine, 2017; Hasz and Redish, 2018; Groman et al., 2019). Unlike these  
367 implementations, we introduced a major structural change to the task – reversals in the transition  
368 probabilities mapping first-step actions to second-step states. We did this to prevent subjects solving  
369 the task by inferring the current state of the reward probabilities (i.e. where rewards have recently  
370 been obtained) and learning fixed habitual strategies conditioned on this latent state (e.g. rewards on  
371 the left → choose up). We have previously shown that such strategies generate behaviour that looks  
372 very similar to model-based RL (Akam et al., 2015). This is a particular concern in animal two-step  
373 tasks. Human subjects are given detailed information about the structure of the task beforehand so  
374 they start with a largely correct model, then perform a limited number of trials with little contrast  
375 between good and bad options. Animal subjects are typically extensively trained, with strong contrast  
376 between good and bad options - giving ample opportunity and incentive to learn alternative  
377 strategies. In humans, extensive training renders apparently model-based behaviour resistant to a  
378 cognitive load manipulation (Economides et al., 2015) which normally disrupts model-based control  
379 (Otto et al., 2013), suggesting that it is possible to develop automatized strategies which closely  
380 resemble planning.

381 Introducing reversals in the transition probabilities breaks the long-term predictive relationship  
382 between where rewards are obtained and which first-step action has higher value. This precludes a  
383 habit-like strategy that exploits this simple relationship, but should not confound a model-based  
384 strategy beyond requiring ongoing learning about the current state of the transition probabilities. We  
385 compared behaviour on versions of the task with and without transition probability reversals, and  
386 found that this radically changed behaviour, both in terms of overall performance and the granular  
387 structure of learning. This strongly suggests that subjects used different strategies on the different  
388 versions, and while not conclusive, is consistent with the idea that with fixed transition probabilities,  
389 subjects learn sophisticated habits operating over the task's latent state space. Another potentially  
390 confounding internal state description in this case is the successor representation (Dayan, 1993),  
391 which characterises current states in terms of their likely future. Successor representations support  
392 rapid updating of values in the face of changes in the reward function (and so could solve the fixed  
393 transition probability version of the task), but not changes in state transition probabilities (and so  
394 could not solve the new task) (Russek et al., 2017). Both of these strategies are of substantial interest  
395 in their own right, so understanding what underpins the behavioural differences between the task  
396 variants is a pressing question for future work.

397 It has been argued that differences in reaction time at the second-step following common vs rare  
398 transitions are additional evidence for model-based RL (Miller et al., 2017). However, in versions of  
399 the task where the actions required by different second-step states are consistent from trial to trial,  
400 reaction time differences may reflect preparatory activity at the level of the motor system, for  
401 example based on the strong correlation between the first-step choice and the *action* that will be  
402 required at the second-step. Indeed, a recent study using a two-step task in humans has shown that  
403 motor responses can show sensitivity to task structure even when choices are model-free (Konovalov  
404 and Krajbich, 2020). We therefore worry that second-step reaction times may not provide strong  
405 evidence that state prediction is used for model-based action evaluation.

406 As a starting point for neurophysiological investigation, we focused on a region of medial frontal cortex  
407 on the boundary between anterior-cingulate regions 24a and 24b and mid-cingulate regions 24a' and  
408 24b' (Vogt and Paxinos, 2014). Though it has not to our knowledge been studied in the context of  
409 distinguishing actions and habits, there are anatomical physiological and lesion-based reasons in  
410 rodents, monkeys and humans for considering this particular role for the structure. First, neurons in  
411 rat (Sul et al., 2010) and monkey (Ito et al., 2003; Matsumoto et al., 2003; Kennerley et al., 2011; Cai  
412 and Padoa-Schioppa, 2012) ACC carry information about chosen actions, reward, action values and  
413 prediction errors during decision making tasks. Where reward type (juice flavour) and size were varied  
414 independently (Cai and Padoa-Schioppa, 2012), a subset of ACC neurons encoded the chosen reward

415 type rather than the reward value, consistent with a role in learning action-state relationships. In a  
416 probabilistic decision making task in which reward probabilities changed in blocks, neuronal  
417 representations in rat ACC underwent abrupt changes when subjects detected a possible block  
418 transition (Karlsson et al., 2012). This suggests that the ACC may represent the block structure of the  
419 task, a form of world model used to guide action selection, albeit one based on learning about latent  
420 states of the world (Gershman and Niv, 2010; Akam et al., 2015), rather than the forward action-state  
421 transition model of classical model-based RL.

422 Second, neuroimaging in the original two-step task has identified representation of model-based value  
423 in anterior- and mid-cingulate regions, suggesting this is an important node in the model-based  
424 controller (Daw et al., 2011; Doll et al., 2015; Huang et al., 2020). Neuroimaging in a two-step task  
425 variant also found evidence for state prediction errors in dorsal ACC (Lockwood et al., 2019),  
426 consistent with our finding that ACC represented whether state transitions were common or rare.  
427 Relatedly, neuroimaging in a saccade task in which subjects constructed and updated a model of the  
428 location of target appearance found ACC activation when subjects updated an internal model of where  
429 saccade targets were likely to appear, (O'Reilly et al., 2013).

430 Third, ACC lesions in macaques produce deficits in tasks which require learning of action-outcome  
431 relationships (Hadland et al., 2003; Kennerley et al., 2006; Rudebeck et al., 2008), though the designs  
432 do not identify whether it is representation of the value or other dimensions of the outcome which  
433 were disrupted. Lesions of rodent ACC produce selective deficits in cost benefit decision making  
434 where subjects must weigh up effort against reward size (Walton et al., 2003; Rudebeck et al., 2006);  
435 however, again, the associative structures concerned are not clear.

436 Finally, the ACC provides a massive innervation to the posterior dorsomedial striatum (Oh et al., 2014;  
437 Hintiryan et al., 2016), a region necessary for learning and expression of goal directed action as  
438 assessed by outcome devaluation (Yin et al., 2005a, 2005b; Hilario et al., 2012).

439 Our study specifically tests the hypothesized role of ACC suggested by this body of work, by showing  
440 that ACC neurons represent variables critical for model-based RL, and that ACC activity is necessary  
441 for using action-state transitions to guide subsequent choice. More broadly, our study shows that it  
442 is possible to fashion sophisticated multi-step decision tasks that mice can acquire quickly and  
443 effectively, bringing to bear modern genetic tools to dissect mechanisms of model-based decision  
444 making.

445

446 **Acknowledgements:**

447 We thank Zach Mainen, Joe Patton, Mark Walton, Tim Behrens, Nathaniel Daw, Kevin Miller and Bruno  
448 Miranda for discussions about the work. The authors acknowledge the use of the Champalimaud  
449 Scientific and Technological Platforms and the University of Oxford Advanced Research Computing  
450 (ARC) facility (<http://dx.doi.org/10.5281/zenodo.22558>).

451 **Author contributions:**

452 Conceptualization: T.A., P.D., R.M.C., Investigation: T.A., I.R.V., I.M., X.Z., M.P., R.O., Data curation:  
453 T.A., I.M., M.P., R.O., Formal analysis: TA, Writing – original draft: T.A., Writing - review and editing  
454 T.A., P.D., R.M.C, Funding Acquisition: T.A., R.M.C, Supervision: P.D., R.M.C.

455 **Funding:**

456 TA was funded by the Wellcome Trust (WT096193AIA). RC was funded by the National Institute of  
457 Health (5U19NS104649) and ERC CoG (617142). PD was funded by the Gatsby Charitable Foundation,  
458 the Max Planck Society and the Humboldt Foundation. M.P., I.R.V. and I.M. were funded by the  
459 Fundação para a Ciência e Tecnologia (SFRH/BD/52222/2013, PD/BD/105950/2014, SFRH/BD/51715  
460 /2011).

461 **Competing interests:**

462 The authors have no competing interests to report.

463

## 464 References:

- 465 Akaishi, R., Umeda, K., Nagase, A., and Sakai, K. (2014). Autonomous Mechanism of Internal Choice  
466 Estimate Underlies Decision Inertia. *Neuron* *81*, 195–206.
- 467 Akam, T., Costa, R., and Dayan, P. (2015). Simple Plans or Sophisticated Habits? State, Transition and  
468 Learning Interactions in the Two-Step Task. *PLoS Comput Biol* *11*, e1004648.
- 469 Balleine, B.W., and Dickinson, A. (1998). Goal-directed instrumental action: contingency and incentive  
470 learning and their cortical substrates. *Neuropharmacology* *37*, 407–419.
- 471 Benjamini, Y., and Hochberg, Y. (1995). Controlling the false discovery rate: a practical and powerful  
472 approach to multiple testing. *J. R. Stat. Soc. Ser. B Methodol.* *57*, 289–300.
- 473 Cai, X., and Padoa-Schioppa, C. (2012). Neuronal encoding of subjective value in dorsal and ventral  
474 anterior cingulate cortex. *J. Neurosci.* *32*, 3791–3808.
- 475 Chuong, A.S., Miri, M.L., Busskamp, V., Matthews, G.A.C., Acker, L.C., Sørensen, A.T., Young, A.,  
476 Klapoetke, N.C., Henninger, M.A., Kodandaramaiah, S.B., et al. (2014). Noninvasive optical inhibition  
477 with a red-shifted microbial rhodopsin. *Nat. Neurosci.* *17*, 1123–1129.
- 478 Daw, N.D., Niv, Y., and Dayan, P. (2005). Uncertainty-based competition between prefrontal and  
479 dorsolateral striatal systems for behavioral control. *Nat. Neurosci.* *8*, 1704–1711.
- 480 Daw, N.D., Gershman, S.J., Seymour, B., Dayan, P., and Dolan, R.J. (2011). Model-based influences on  
481 humans' choices and striatal prediction errors. *Neuron* *69*, 1204–1215.
- 482 Dezfouli, A., and Balleine, B.W. (2017). Learning the structure of the world: The adaptive nature of  
483 state-space and action representations in multi-stage decision-making. *BioRxiv* 211664.
- 484 Dolan, R.J., and Dayan, P. (2013). Goals and Habits in the Brain. *Neuron* *80*, 312–325.
- 485 Doll, B.B., Duncan, K.D., Simon, D.A., Shohamy, D., and Daw, N.D. (2015). Model-based choices involve  
486 prospective neural activity. *Nat. Neurosci.* *18*, 767–772.
- 487 Doll, B.B., Bath, K.G., Daw, N.D., and Frank, M.J. (2016). Variability in Dopamine Genes Dissociates  
488 Model-Based and Model-Free Reinforcement Learning. *J. Neurosci.* *36*, 1211–1222.
- 489 Economides, M., Kurth-Nelson, Z., Lübbert, A., Guitart-Masip, M., and Dolan, R.J. (2015). Model-Based  
490 Reasoning in Humans Becomes Automatic with Training. *PLoS Comput Biol* *11*, e1004463.
- 491 Gershman, S.J., and Niv, Y. (2010). Learning latent structure: carving nature at its joints. *Curr. Opin.*  
492 *Neurobiol.* *20*, 251–256.
- 493 Ghosh, K.K., Burns, L.D., Cocker, E.D., Nimmerjahn, A., Ziv, Y., Gamal, A.E., and Schnitzer, M.J. (2011).  
494 Miniaturized integration of a fluorescence microscope. *Nat. Methods* *8*, 871–878.
- 495 Gillan, C.M., Kosinski, M., Whelan, R., Phelps, E.A., and Daw, N.D. (2016). Characterizing a psychiatric  
496 symptom dimension related to deficits in goal-directed control. *ELife* *5*, e11305.
- 497 Gold, J.I., Law, C.-T., Connolly, P., and Bennur, S. (2008). The Relative Influences of Priors and Sensory  
498 Evidence on an Oculomotor Decision Variable During Perceptual Learning. *J. Neurophysiol.* *100*, 2653–  
499 2668.

- 500 Groman, S.M., Massi, B., Mathias, S.R., Curry, D.W., Lee, D., and Taylor, J.R. (2019). Neurochemical  
501 and Behavioral Dissections of Decision-Making in a Rodent Multistage Task. *J. Neurosci.* *39*, 295–306.
- 502 Hadland, K.A., Rushworth, M.F.S., Gaffan, D., and Passingham, R.E. (2003). The Anterior Cingulate and  
503 Reward-Guided Selection of Actions. *J. Neurophysiol.* *89*, 1161–1164.
- 504 Hasz, B.M., and Redish, A.D. (2018). Deliberation and Procedural Automation on a Two-Step Task for  
505 Rats. *Front. Integr. Neurosci.* *12*.
- 506 Heilbronner, S.R., and Hayden, B.Y. (2016). Dorsal Anterior Cingulate Cortex: A Bottom-Up View. *Annu.*  
507 *Rev. Neurosci.* *39*, 149–170.
- 508 Hilario, M., Holloway, T., Jin, X., and Costa, R.M. (2012). Different dorsal striatum circuits mediate  
509 action discrimination and action generalization. *Eur. J. Neurosci.* *35*, 1105–1114.
- 510 Hintiryan, H., Foster, N.N., Bowman, I., Bay, M., Song, M.Y., Gou, L., Yamashita, S., Bienkowski, M.S.,  
511 Zingg, B., Zhu, M., et al. (2016). The mouse cortico-striatal projectome. *Nat. Neurosci.*
- 512 Huang, Y., Yapple, Z.A., and Yu, R. (2020). Goal-oriented and habitual decisions: Neural signatures of  
513 model-based and model-free learning. *NeuroImage* *215*, 116834.
- 514 Huys, Q.J.M., Cools, R., Gölzer, M., Friedel, E., Heinz, A., Dolan, R.J., and Dayan, P. (2011). Disentangling  
515 the Roles of Approach, Activation and Valence in Instrumental and Pavlovian Responding. *PLoS*  
516 *Comput Biol* *7*, e1002028.
- 517 Huys, Q.J.M., Eshel, N., O’Nions, E., Sheridan, L., Dayan, P., and Roiser, J.P. (2012). Bonsai trees in your  
518 head: how the Pavlovian system sculpts goal-directed choices by pruning decision trees. *PLoS Comput.*  
519 *Biol.* *8*, e1002410.
- 520 Ito, M., and Doya, K. (2009). Validation of decision-making models and analysis of decision variables  
521 in the rat basal ganglia. *J. Neurosci.* *29*, 9861–9874.
- 522 Ito, M., and Doya, K. (2015). Distinct Neural Representation in the Dorsolateral, Dorsomedial, and  
523 Ventral Parts of the Striatum during Fixed- and Free-Choice Tasks. *J. Neurosci.* *35*, 3499–3514.
- 524 Ito, S., Stuphorn, V., Brown, J.W., and Schall, J.D. (2003). Performance Monitoring by the Anterior  
525 Cingulate Cortex During Saccade Countermanding. *Science* *302*, 120–122.
- 526 Karlsson, M.P., Tervo, D.G., and Karpova, A.Y. (2012). Network resets in medial prefrontal cortex mark  
527 the onset of behavioral uncertainty. *Science* *338*, 135–139.
- 528 Kennerley, S.W., Walton, M.E., Behrens, T.E.J., Buckley, M.J., and Rushworth, M.F.S. (2006). Optimal  
529 decision making and the anterior cingulate cortex. *Nat Neurosci* *9*, 940–947.
- 530 Kennerley, S.W., Behrens, T.E., and Wallis, J.D. (2011). Double dissociation of value computations in  
531 orbitofrontal and anterior cingulate neurons. *Nat. Neurosci.* *14*, 1581–1589.
- 532 Keramati, M., Dezfouli, A., and Piray, P. (2011). Speed/accuracy trade-off between the habitual and  
533 the goal-directed processes. *PLoS Comput. Biol.* *7*, e1002055.
- 534 Konovalov, A., and Krajbich, I. (2020). Mouse tracking reveals structure knowledge in the absence of  
535 model-based choice. *Nat. Commun.* *11*, 1–9.



- 536 Kool, W., Cushman, F.A., and Gershman, S.J. (2016). When Does Model-Based Control Pay Off? *PLOS*  
537 *Comput Biol* *12*, e1005090.
- 538 Lee, S.W., Shimojo, S., and O’Doherty, J.P. (2014). Neural Computations Underlying Arbitration  
539 between Model-Based and Model-free Learning. *Neuron* *81*, 687–699.
- 540 Lockwood, P., Klein-Flugge, M., Abdurahman, A., and Crockett, M. (2019). Neural signatures of model-  
541 free learning when avoiding harm to self and other. *BioRxiv* 718106.
- 542 Matsumoto, K., Suzuki, W., and Tanaka, K. (2003). Neuronal correlates of goal-based motor selection  
543 in the prefrontal cortex. *Science* *301*, 229–232.
- 544 Miller, K.J., Botvinick, M.M., and Brody, C.D. (2017). Dorsal hippocampus contributes to model-based  
545 planning. *Nat. Neurosci.* *20*, 1269–1276.
- 546 Miller, K.J., Shenhav, A., and Ludvig, E.A. (2019). Habits without values. *Psychol. Rev.* 292–311.
- 547 Miranda, B., Malalasekera, W.M.N., Behrens, T.E., Dayan, P., and Kennerley, S.W. (2019). Combined  
548 model-free and model-sensitive reinforcement learning in non-human primates. *BioRxiv* 836007.
- 549 Oh, S.W., Harris, J.A., Ng, L., Winslow, B., Cain, N., Mihalas, S., Wang, Q., Lau, C., Kuan, L., Henry, A.M.,  
550 et al. (2014). A mesoscale connectome of the mouse brain. *Nature* *508*, 207–214.
- 551 O’Reilly, J.X., Schüffelgen, U., Cuell, S.F., Behrens, T.E., Mars, R.B., and Rushworth, M.F. (2013).  
552 Dissociable effects of surprise and model update in parietal and anterior cingulate cortex. *Proc. Natl.*  
553 *Acad. Sci.* *110*, E3660–E3669.
- 554 Otto, A.R., Gershman, S.J., Markman, A.B., and Daw, N.D. (2013). The Curse of Planning Dissecting  
555 Multiple Reinforcement-Learning Systems by Taxing the Central Executive. *Psychol. Sci.* *24*, 751–761.
- 556 Pachitariu, M., Steinmetz, N., Kadir, S., Carandini, M., and Harris, K.D. (2016). Kilosort: realtime spike-  
557 sorting for extracellular electrophysiology with hundreds of channels. *BioRxiv* 061481.
- 558 Paxinos, G., and Franklin, K.B. (2007). *The mouse brain in stereotaxic coordinates* -3rd Edition  
559 (Academic Press).
- 560 Rudebeck, P.H., Walton, M.E., Smyth, A.N., Bannerman, D.M., and Rushworth, M.F.S. (2006). Separate  
561 neural pathways process different decision costs. *Nat. Neurosci.* *9*, 1161–1168.
- 562 Rudebeck, P.H., Behrens, T.E., Kennerley, S.W., Baxter, M.G., Buckley, M.J., Walton, M.E., and  
563 Rushworth, M.F.S. (2008). Frontal Cortex Subregions Play Distinct Roles in Choices between Actions  
564 and Stimuli. *J. Neurosci.* *28*, 13775–13785.
- 565 Rushworth, M.F.S., and Behrens, T.E.J. (2008). Choice, uncertainty and value in prefrontal and  
566 cingulate cortex. *Nat. Neurosci.* *11*, 389–397.
- 567 Russek, E.M., Momennejad, I., Botvinick, M.M., Gershman, S.J., and Daw, N.D. (2017). Predictive  
568 representations can link model-based reinforcement learning to model-free mechanisms. *PLOS*  
569 *Comput. Biol.* *13*, e1005768.
- 570 Sebold, M., Deserno, L., Nebe, S., Schad, D.J., Garbusow, M., Hägele, C., Keller, J., Jünger, E., Kathmann,  
571 N., Smolka, M., et al. (2014). Model-Based and Model-Free Decisions in Alcohol Dependence.  
572 *Neuropsychobiology* *70*, 122–131.

- 573 Shahar, N., Moran, R., Hauser, T.U., Kievit, R.A., McNamee, D., Moutoussis, M., Consortium, N., and  
574 Dolan, R.J. (2019). Credit assignment to state-independent task representations and its relationship  
575 with model-based decision making. *Proc. Natl. Acad. Sci.* *116*, 15871–15876.
- 576 Simon, D.A., and Daw, N.D. (2011). Neural Correlates of Forward Planning in a Spatial Decision Task in  
577 Humans. *J. Neurosci.* *31*, 5526–5539.
- 578 Smittenaar, P., FitzGerald, T.H.B., Romei, V., Wright, N.D., and Dolan, R.J. (2013). Disruption of  
579 Dorsolateral Prefrontal Cortex Decreases Model-Based in Favor of Model-free Control in Humans.  
580 *Neuron*.
- 581 Sul, J.H., Kim, H., Huh, N., Lee, D., and Jung, M.W. (2010). Distinct roles of rodent orbitofrontal and  
582 medial prefrontal cortex in decision making. *Neuron* *66*, 449–460.
- 583 Sutton, R.S., and Barto, A.G. (1998). Reinforcement learning: An introduction (The MIT press).
- 584 Thorndike, E.L. (1911). *Animal intelligence: Experimental studies*.
- 585 Vogt, B.A., and Paxinos, G. (2014). Cytoarchitecture of mouse and rat cingulate cortex with human  
586 homologies. *Brain Struct. Funct.* *219*, 185–192.
- 587 Voon, V., Derbyshire, K., Rück, C., Irvine, M.A., Worbe, Y., Enander, J., Schreiber, L.R.N., Gillan, C.,  
588 Fineberg, N.A., Sahakian, B.J., et al. (2015). Disorders of compulsivity: a common bias towards learning  
589 habits. *Mol. Psychiatry* *20*, 345–352.
- 590 Walton, M.E., Bannerman, D.M., Alterescu, K., and Rushworth, M.F.S. (2003). Functional specialization  
591 within medial frontal cortex of the anterior cingulate for evaluating effort-related decisions. *J.*  
592 *Neurosci.* *23*, 6475.
- 593 Wunderlich, K., Smittenaar, P., and Dolan, R.J. (2012). Dopamine Enhances Model-Based over Model-  
594 Free Choice Behavior. *Neuron* *75*, 418–424.
- 595 Yin, H.H., Knowlton, B.J., and Balleine, B.W. (2005a). Blockade of NMDA receptors in the dorsomedial  
596 striatum prevents action–outcome learning in instrumental conditioning. *Eur. J. Neurosci.* *22*, 505–  
597 512.
- 598 Yin, H.H., Ostlund, S.B., Knowlton, B.J., and Balleine, B.W. (2005b). The role of the dorsomedial  
599 striatum in instrumental conditioning. *Eur. J. Neurosci.* *22*, 513–523.
- 600 Zhou, P., Resendez, S.L., Rodriguez-Romaguera, J., Jimenez, J.C., Neufeld, S.Q., Giovannucci, A.,  
601 Friedrich, J., Pnevmatikakis, E.A., Stuber, G.D., Hen, R., et al. (2018). Efficient and accurate extraction  
602 of in vivo calcium signals from microendoscopic video data. *ELife* *7*, e28728.
- 603

## 604 Methods:

### 605 *Experimental model and subject details:*

606 All procedures were reviewed and performed in accordance with the Champalimaud Centre for the  
607 Unknown Ethics Committee guidelines. 65 male C57BL mice aged between 2 – 3 months at the start  
608 of experiments were used in the study. Animals were housed under a 12 hours light/dark cycle with  
609 experiments performed during the light cycle. 17 subjects were used in the two-step task baseline  
610 behaviour dataset. 4 subjects were used in the ACC imaging. 2 subjects were used for  
611 electrophysiology controls for the optogenetics. 14 subjects (8 JAWS, 6 GFP controls) were used for  
612 the two-step task ACC manipulation only. 14 subjects (8 JAWS, 6 GFP controls) were used for the  
613 probabilistic reversal learning task ACC manipulation only. 14 subjects (8 JAWS, 6 GFP controls) were  
614 first trained and tested on the two-step ACC manipulation, then retrained for a week on the  
615 probabilistic reversal learning task and tested on the ACC manipulation in this task. 7 JAWS-GFP  
616 animals were excluded from the study due to poor or mis-located JAWS expression. In the group that  
617 was tested on both tasks, 1 Jaws and 2 control animals were lost from the study before optogenetic  
618 manipulation on the probabilistic reversal learning task due to failure of the LED implants. The  
619 resulting group sizes for the optogenetic manipulation experiments were as reported in the results  
620 section.

### 621 Method details:

#### 622 *Behaviour:*

623 Mice were placed on water restriction 48 hours before the first behavioural training session, and given  
624 1 hour ad libitum access to water in their home cage 24 hours before the first training session. Mice  
625 received 1 training session per day of duration 1.5 – 2 hours, and were trained 6 days per week with  
626 1 hour *ad libitum* water access in their home cage on their day off. During behavioural training mice  
627 had access to dry chow in the testing apparatus as we found this increased the number of trials  
628 performed and amount of water consumed. On days when mice were trained they typically received  
629 all their water in the task (typically 0.5-1.25ml), but additional water was provided as required to  
630 maintain a body weight >85% of their pre-restriction weight. Under this protocol, bodyweight typically  
631 dropped to ~90% of pre-restriction level in the first week of training, then gradually increased over  
632 weeks to reach a steady state of ~95-105% pre-restriction body weight.

633 Behavioural experiments were performed in 14 custom made 12x12cm operant chambers using  
634 pyControl (<http://pycontrol.readthedocs.io/>), a behavioural experiment control system built around  
635 the Micropython microcontroller.

| <b>Session number</b> | <b>Reward size (ul)</b> | <b>Transition probabilities (common / rare)</b> | <b>Reward probabilities (good / bad side)</b>        |
|-----------------------|-------------------------|-------------------------------------------------|------------------------------------------------------|
| 1                     | 10                      | 0.9 / 0.1                                       | First 40 trials all rewarded, subsequently 0.9 / 0.1 |
| 2 - 4                 | 10                      | 0.9 / 0.1                                       | 0.9 / 0.1                                            |
| 5 - 6                 | 6.5                     | 0.9 / 0.1                                       | 0.9 / 0.1                                            |
| 7 - 8                 | 4                       | 0.9 / 0.1                                       | 0.9 / 0.1                                            |
| 9 - 12                | 4                       | 0.8 / 0.2                                       | 0.9 / 0.1                                            |
| 13+                   | 4                       | 0.8 / 0.2                                       | 0.8 / 0.2                                            |

636 Two-step task

637 The apparatus, trial structure and block structure of the two-step task are described in the results  
638 section. Block transitions were triggered based on subject's behaviour, occurring 20 trials after an  
639 exponential moving average ( $\tau = 8$  trials) of subject's choices crossed a 75% correct threshold. The  
640 20 trial delay between the threshold crossing and block transition allowed subjects performance at  
641 the end of blocks to be assessed without selection bias due to the block transition rule. In neutral  
642 blocks where there was no correct choice, block transitions occurred with 0.1 probability on each trial  
643 after the 40<sup>th</sup>, giving a mean neutral block length of 50 trials. Subjects started each session with the  
644 reward and transition probabilities in the same state that the previous session finished on.

645 Subjects encountered the full trial structure from the first day of training. The only task parameters  
646 that were changed over the course of training were the reward and state transition probabilities and  
647 the reward sizes. These were changed to gradually increase task difficulty over days of training, with  
648 this typical trajectory of parameter changes shown in table 1.

649 Probabilistic reversal learning task

650 Mice were trained to initiate each trial in a central nose-poke port which was flanked by left and right  
651 poke ports. Trial initiation caused the left and right pokes to light up and subjects then chose between  
652 them for the chance of obtaining a water reward. Reward probabilities changed in blocks, with three  
653 block types; *left good* (left=0.75/right=0.25), *neutral* (0.5/0.5) and *right good* (0.25/0.75). Block  
654 transitions from non-neutral blocks were triggered 10 trials after an exponential moving average ( $\tau$   
655 = 8 trials) crossed a 75% correct threshold. Block transitions from neutral blocks occurred with  
656 probability 0.1 on each trial after the 15<sup>th</sup> of the block to give an average neutral block length of 25  
657 trials.

658 *Optogenetic Inhibition*

659 Experimental animals were injected bilaterally with *AAV5-CamKII-Jaws-KGC-GFP-ER2* (UNC vector  
660 core, titre:  $5.9 \times 10^{12}$ ) using 16 injections each of 50nL (total 800nL) spread across 4 injection tracks (2  
661 per hemisphere) at coordinates: AP: 0, 0.5, ML:  $\pm 0.4$ , DV: -1, -1.2, -1.4, -1.6mm relative to dura.  
662 Control animals were injected with *AAV5-CaMKII-GFP* (UNC vector core, titre:  $2.9 \times 10^{12}$ ) at the same  
663 coordinates. Injections were performed at a rate of 4.6nL/5 seconds, using a Nanojet II (Drummond  
664 Scientific) with bevelled glass micropipettes of tip diameter 50-100um. A circular craniotomy of  
665 diameter 1.8mm was centred on AP: 0.25, ML: 0, and a high power red led (Cree XLamp XP-E2) was  
666 positioned above the craniotomy touching the dura. The LED was mounted on a custom designed  
667 insulated metal substrate PCB (Figure 6A). The LEDs were powered using a custom designed constant  
668 current LED driver. Light stimulation (50mW, 630nm) was delivered on stimulation trials from when  
669 the subject entered the side poke until the subsequent choice, up to a maximum of 6 seconds.  
670 Stimulation was delivered on a randomly selected 17% of trials, with a minimum of 2 non-stimulated  
671 trials between each stimulation trial followed by a 0.25 probability of stimulation on each subsequent  
672 trial. At the end of behavioural experiments, animals were sacrificed and perfused with  
673 paraformaldehyde (4%). The brains were sectioned in 50um coronal slices and the location of viral  
674 expression was characterised with fluorescence microscopy (Figure S4).

675 Two animals were injected unilaterally with the *JAWS-GFP* virus using the coordinates described above  
676 and implanted with the LED implant and a movable bundle of 16 tungsten micro-wires of 23 $\mu$ m  
677 diameter (Innovative-Neurophysiology) to record unit activity. After 4 weeks of recovery, recording  
678 sessions were performed at 24 hour intervals and the electrode bundle was advanced by 50 um after  
679 each session, covering a depth range of 300 – 1300um from dura over the course of recordings. During  
680 recording sessions mice were free to move inside a sound attenuating chamber. Light pulses (50mW  
681 power, 5 second duration) were delivered at random intervals with a mean inter-stimulus interval of  
682 30 seconds. Neural activity was acquired using a Plexon recording system running Omniplex v. 1.11.3.  
683 The signals were digitally recorded at 40000 Hz and subsequently band-pass filtered between 200 Hz  
684 and 3000 Hz. Following filtering, spikes were detected using an amplitude threshold set at twice the  
685 standard deviation of the bandpass filtered signal. Initial sorting was performed automatically using  
686 Kilosort (Pachitariu et al., 2016). The results were refined via manual sorting based on waveform  
687 characteristics, PCA and inter-spike interval histogram. Clusters were classified as single units if well  
688 separated from noise and other units and the spike rate in the 2ms following each spike was less than  
689 1% of the average spike rate.

690 *ACC imaging*

691 Mice were anaesthetized with a mix of 1-1.5% isoflurane and oxygen (1 l.min<sup>-1</sup>), while body  
692 temperature was monitored and maintained at 33°C using a temperature controller (ATC1000, World  
693 Precision Instruments). Unilateral injection of 300 nl of AAV5.αCaMKII.GCaMP6f.WPRE.SV40 (titer:  
694 2.43×10<sup>13</sup>, Penn Vector Core) into the right Anterior Cingulate Cortex (AP: +1.0 mm; ML: +0.45mm;  
695 DV: -1.4mm) was performed using a Nanojet II Injector (Drummond Scientific, USA) at a rate of 4.6 nl  
696 per pulse, every 5 s. Injection pipette was left in place 20 min post-injection before removal. 25  
697 minutes after injection, a 1mm diameter circular craniotomy was centered at coordinates (AP: +1.0  
698 mm; ML: +0.55mm) and a 1mm GRIN lens (Inscopix) was implanted above the injection site at a depth  
699 of -1.2 mm ventral to the surface, and secured to the skull using cyanoacrylate (Loctite) and black  
700 dental cement (Ortho-Jet, Lang Dental USA). One 1/16-inch stainless-steel screw (Antrin miniatures)  
701 was attached to the skull to secure the cement cap that fixed the lens to the skull. Mice were then  
702 given an i.p. injection of buprenorfin (Bupaq, 0.1 mg.kg<sup>-1</sup>) and allowed to recover from anaesthesia in  
703 a heating mat before returning to home cage.

704 Three to four weeks after surgery, mice were anaesthetized and placed in the stereotactic frame,  
705 where a miniaturized fluorescence microscope (Inscopix) attached to a magnetic baseplate (Inscopix)  
706 were lowered to the top of the implanted GRIN lens, until a sharp image of anatomical landmarks  
707 (blood vessels) and putative neurons appeared in the focal plane. Baseplate was then cemented to  
708 the original head cap, allowing to fix the set focal plane for imaging.

709 For image acquisition during task behaviour, mice were briefly anaesthetized using a mixture of  
710 isoflurane (0.5-1%) and oxygen (1 l.min<sup>-1</sup>) and the miniaturized microscope was attached and  
711 secured to the baseplate. This was followed by a 20-30 min period of recovery in the home cage before  
712 imaging experiments. Image acquisition (nVistaHD, Inscopix) was done at 10 Hz, with LED power set  
713 to 10-30% (0.1-0.3 mW) with a gain of 3. Image acquisition parameters were set to the same values  
714 between sessions for each mouse.

715 Quantification and statistical analysis:

716 All analysis of behavioural data was performed in Python 3.

| <b>Name</b>                                  | <b>Effect</b>                                                               |
|----------------------------------------------|-----------------------------------------------------------------------------|
| <i>Bias: top/bottom</i>                      | Choose top-poke                                                             |
| <i>Bias:clockwise<br/>/counter-clockwise</i> | Choose top if previous trial ended at left poke, bottom if at right         |
| <i>Choice</i>                                | Repeat choice                                                               |
| <i>Correct</i>                               | Repeat correct choice                                                       |
| <i>Outcome</i>                               | Repeat rewarded choice                                                      |
| <i>Transition</i>                            | Repeat choice followed by common transition                                 |
| <i>Transition-outcome<br/>interaction</i>    | Repeat choice followed by rewarded common and non-rewarded rare transitions |

717 *Logistic regression*

718 Binary predictors used in logistic regressions are shown in table 2. The two-step task previous trial  
719 logistic regression (Figure 2B) used all predictors in table 1. The two-step task lagged logistic  
720 regression used predictors *Choice*, *Outcome*, *Transition* and *Transition-outcome interaction* at lags 1,  
721 2, 3-4, 5-8, 8-12 (where lag 3-4 etc. means the sum of the individual trial predictors over the specified  
722 range of lags) and predictors *Bias: top/bottom*, and *Bias:clockwise/counter-clockwise*. The *Correct*  
723 predictors was included in the previous trial regression to prevent correlations across trials from  
724 causing spurious loading on the *Transition-outcome interaction* predictor (see Akam et. al. 2015 for  
725 discussion). It was not included in the lagged regression as here the effect of earlier trials is accounted  
726 for by the lagged predictors. For the two-step task regressions, the first 20 trials after each reversal in  
727 the transition probabilities was exclude for the analysis as it is ambiguous which transitions are  
728 common and rare at this point. This resulted in ~9% of trials being excluded.

729 The logistic regression analysis for the probabilistic reversal learning task (Figure S6D) used predictors  
730 *Choice*, and *Outcome* at lags 1, 2, 3.



| <b>Table 3: RL model variables and parameters</b> |                                                                                          |
|---------------------------------------------------|------------------------------------------------------------------------------------------|
| <b>Model variables</b>                            |                                                                                          |
| $r$                                               | reward (0 or 1)                                                                          |
| $c$                                               | choice taken at first step (top or bottom poke)                                          |
| $c'$                                              | choice not taken at first step (top or bottom poke)                                      |
| $s$                                               | Second-step state (left-active or right-active)                                          |
| $s'$                                              | State not reached at second step (left-active or right-active)                           |
| $Q_{mf}(c)$                                       | Model-free action value for choice $c$                                                   |
| $Q_{mo}(c, s_{t-1})$                              | Motor-level model-free action value for choice $c$ following second-step state $s_{t-1}$ |
| $Q_{mb}(c)$                                       | Model-based value of choice $c$                                                          |
| $V(s)$                                            | Value of state $s$                                                                       |
| $P(s c)$                                          | Estimated transition probability of reaching state $s$ after choice $c$                  |
| $\bar{c}$                                         | Choice history                                                                           |
| $\bar{m}(s_{t-1})$                                | Motor action history, i.e. choice history following second-step state $s_{t-1}$          |
| <b>Model parameters</b>                           |                                                                                          |
| $\alpha_Q$                                        | Value learning rate                                                                      |
| $f_Q$                                             | Value forgetting rate                                                                    |
| $\lambda$                                         | Eligibility trace parameter                                                              |
| $\alpha_T$                                        | Transition learning rate                                                                 |
| $f_T$                                             | Transition forgetting rate                                                               |
| $\alpha_c$                                        | Learning rate for choice perseveration                                                   |
| $\alpha_m$                                        | Learning rate for motor-level perseveration                                              |
| $G_{mf}$                                          | Model-free action value weight                                                           |
| $G_{mo}$                                          | Motor-level model free action value weight                                               |
| $G_{mb}$                                          | Model-based action value weight                                                          |
| $B_c$                                             | Choice bias (top/bottom)                                                                 |
| $B_r$                                             | Rotational bias (clockwise/counter-clockwise)                                            |
| $P_c$                                             | Choice perseveration strength                                                            |
| $P_m$                                             | Motor-level perseveration strength                                                       |

731 *Reinforcement learning models:*

732 RL model variables and parameters are listed in table 3.

733 Choice and state values were updated as:

734  $Q_{mf}(c) \leftarrow (1 - \alpha_Q)Q_{mf}(c) + \alpha_Q (\lambda r + (1 - \lambda)V(s))$

735  $V(s) \leftarrow (1 - \alpha_Q)V(s) + \alpha_Q r$

736 In models that included value forgetting this was implemented as:

$$737 \quad Q_{mf}(c') \leftarrow (1 - f_Q)Q_{mf}(c')$$

$$738 \quad V(s') \leftarrow (1 - f_Q)V(s')$$

739 Action-state transition probabilities used by the model-based system were updated as:

$$740 \quad P(s|c) \leftarrow (1 - \alpha_T)P(s|c) + \alpha_T$$

$$741 \quad P(s'|c) \leftarrow (1 - \alpha_T)P(s'|c)$$

742 In models that included transition probability forgetting this was implemented as:

$$743 \quad P(s|c') \leftarrow (1 - f_T)P(s|c') + 0.5f_T$$

$$744 \quad P(s'|c') \leftarrow (1 - f_T)P(s'|c') + 0.5f_T$$

745 At the start of each trial, model-based first step action values were calculated as:

$$746 \quad Q_{mb}(c) = \sum_s P(s|c)V(s)$$

747 Models that included model-free values for first step motor actions (e.g. left  $\rightarrow$  top), updated these as:

$$748 \quad Q_{mo}(c, s_{t-1}) \leftarrow (1 - \alpha_Q)Q_{mo}(c, s_{t-1}) + \alpha_Q (\lambda r + (1 - \lambda)V(s))$$

749 Motor level model-free value forgetting was implemented as:

$$750 \quad Q_{mo}(m') \leftarrow (1 - f_Q)Q_{mo}(m')$$

751 Where  $m'$  are all motor actions not taken.

752 Choice perseveration was modelled using a choice history variable  $\bar{c}$ . In models using single trial perseveration this was:

$$754 \quad \bar{c} = c_{t-1} - 0.5$$

755 where  $c_{t-1} = 1$  if previous choice is top and 0 if previous choice is bottom.

756 In models using multi-trial perseveration  $\bar{c}$  was an exponential moving average of recent choices, updated as:

$$758 \quad \bar{c} \leftarrow (1 - \alpha_c)\bar{c} + \alpha_c(c - 0.5)$$

759 where  $c = 1$  if choice is top and  $c = 0$  if choice is bottom.

760 In models which used motor-level perseveration this was modelled using variables  $\bar{m}(s_{t-1})$  which were exponential moving averages of choices following trials ending in state  $s_{t-1}$ , updated as:

$$763 \quad \bar{m}(s_{t-1}) \leftarrow (1 - \alpha_m)\bar{m}(s_{t-1}) + \alpha_m(c - 0.5)$$

764 Net action values were given by a weighted sum of model-free, motor-level model-free and model-  
765 based action values, biases and perseveration.

$$766 \quad Q_{net}(c) = G_{mf}Q_{mf}(c) + G_{mo}Q_{mo}(c, s_{t-1}) + G_{mb}Q_{mb}(c) + X(c)$$

767 Where  $G_{mf}$ ,  $G_{mo}$  and  $G_{mb}$  are weights controlling the influence of respectively the model-free,  
768 motor-level model-free and model-based action values, and  $X(c)$  is biases and perseveration where:

$$769 \quad X(top) = B_c + B_r(s_{t-1} - 0.5) + P_c\bar{c} + P_m\bar{m}$$

$$770 \quad X(bottom) = 0$$

771 where  $s_{t-1} = 1$  if previous second step state is left and 0 if right.

772 Net action values determined choice probabilities via the softmax decision rule:

$$773 \quad P(c) = \frac{e^{Q_{net}(c)}}{\sum_c e^{Q_{net}(c)}}$$

774 *Hierarchical modelling:*

775 Both the logistic regression analyses and reinforcement learning model fitting used a Bayesian  
776 hierarchical modelling framework (Huys et al., 2011), in which parameter vectors  $\mathbf{h}_i$  for individual  
777 sessions were assumed to be drawn from Gaussian distributions at the population level with means  
778 and variance  $\boldsymbol{\theta} = \{\boldsymbol{\mu}, \boldsymbol{\Sigma}\}$ . The population level prior distributions were set to their maximum  
779 likelihood estimate:

$$780 \quad \boldsymbol{\theta}^{ML} = \underset{\boldsymbol{\theta}}{\operatorname{argmax}} \{p(D|\boldsymbol{\theta})\} = \underset{\boldsymbol{\theta}}{\operatorname{argmax}} \left\{ \prod_i^N \int d\mathbf{h}_i p(D_i|\mathbf{h}_i)p(\mathbf{h}_i|\boldsymbol{\theta}) \right\}$$

781 Optimisation was performed using the Expectation-Maximisation algorithm with a Laplace  
782 approximation for the E-step at the k-th iteration given by:

$$783 \quad p(\mathbf{h}_i^k|D_i) = N(\mathbf{m}_i^k, \mathbf{V}_i^k)$$

$$784 \quad \mathbf{m}_i^k = \underset{\mathbf{h}}{\operatorname{argmax}} \{p(D_i|\mathbf{h})p(\mathbf{h}|\boldsymbol{\theta}^{k-1})\}$$

785 Where  $N(\mathbf{m}_i^k, \mathbf{V}_i^k)$  is a normal distribution with mean  $\mathbf{m}_i^k$  given by the maximum a posteriori value of  
786 the session parameter vector  $\mathbf{h}_i$  given the population level means and variance  $\boldsymbol{\theta}^{k-1}$ , and the  
787 covariance  $\mathbf{V}_i^k$  given by the inverse Hessian of the likelihood around  $\mathbf{m}_i^k$ . For simplicity we assumed  
788 that the population level covariance  $\boldsymbol{\Sigma}$  had zero off-diagonal terms. For the k-th M-step of the EM  
789 algorithm the population level prior distribution parameters  $\boldsymbol{\theta} = \{\boldsymbol{\mu}, \boldsymbol{\Sigma}\}$  are updated as:

$$790 \quad \boldsymbol{\mu}^k = \frac{1}{N} \sum_{i=1}^N \mathbf{m}_i^k$$

$$791 \quad \Sigma = \frac{1}{N} \sum_{i=1}^N \left[ (\mathbf{m}_i^k)^2 + \mathbf{V}_i^k \right] - (\boldsymbol{\mu}^k)^2$$

792 Parameters were transformed before inference to enforce constraints ( $0 < \{G_{mf}, G_{mo}, G_{mb}\}$ ,  $0 <$   
 793  $\{\alpha_Q, f_Q, \lambda, \alpha_T, f_T, \alpha_c, \alpha_m\} < 1$ ).

794 *Model comparison:*

795 To compare the goodness of fit for models with different numbers of parameters we used the  
 796 integrated Bayes Information Criterion (iBIC) score. The iBIC score is related to the model log  
 797 likelihood  $p(D|M)$  as:

$$798 \quad \log p(D|M) = \int d\boldsymbol{\theta} p(D|\boldsymbol{\theta})p(\boldsymbol{\theta}|M)$$

$$799 \quad \approx -\frac{1}{2}iBIC = \log p(D|\boldsymbol{\theta}^{ML}) - \frac{1}{2}|M|\log |D|$$

800 Where  $|M|$  is the number of fitted parameters of the prior,  $|D|$  is the number of data points (total  
 801 choices made by all subjects) and iBIC is the integrated BIC score. The log data likelihood given  
 802 maximum likelihood parameters for the prior  $\log p(D|\boldsymbol{\theta}^{ML})$  is calculated by integrating out the  
 803 individual session parameters:

$$804 \quad \log p(D|\boldsymbol{\theta}^{ML}) = \sum_i^N \log \int d\mathbf{h} p(D_i|\mathbf{h})p(\mathbf{h}|\boldsymbol{\theta}^{ML}) \approx \sum_i^N \log \frac{1}{K} \sum_{j=1}^K p(D_i|\mathbf{h}^j)$$

805 Where the integral is approximated as the average over  $K$  samples drawn from the prior  $p(\mathbf{h}|\boldsymbol{\theta}^{ML})$ .  
 806 Bootstrap 95% confidence intervals were estimated for the iBIC scores by resampling from the  
 807 population of samples drawn from the prior.

808 *Permutation testing:*

809 Permutation testing was used to assess the significance of differences in model fits between  
 810 stimulated and non-stimulated trials. The regression model was fit separately to stimulated and non-  
 811 stimulated trials to give two sets of population level parameters  $\boldsymbol{\theta}_s = \{\boldsymbol{\mu}_s, \boldsymbol{\Sigma}_s\}$  and  $\boldsymbol{\theta}_n = \{\boldsymbol{\mu}_n, \boldsymbol{\Sigma}_n\}$ ,  
 812 where  $\boldsymbol{\theta}_s$  are the parameters for the stimulated trials and  $\boldsymbol{\theta}_n$  are the parameters for the non-  
 813 stimulated trials. The difference between the population level means for the stimulated and non-  
 814 stimulated conditions were calculated as:

$$815 \quad \Delta\boldsymbol{\mu}_{true} = \boldsymbol{\mu}_s - \boldsymbol{\mu}_n$$

816 An ensemble of  $N = 5000$  permuted datasets was then created by shuffling the labels on trials such  
 817 that trials were randomly assigned to the ‘stimulated’ and ‘non-stimulated’ conditions. The model  
 818 was fit separately to the stimulated and non-stimulated trials for each permuted dataset and the

819 difference between population level means in the stimulated and non-stimulated conditions was  
820 calculated for each permuted dataset  $i$  as:

$$821 \quad \Delta\mu_{perm}^i = \mu_s^i - \mu_n^i$$

822 The distribution of  $\Delta\mu_{perm}$  over the population of permuted datasets approximates the distribution  
823 under the null hypothesis that stimulation does not affect the model parameters. The P-values for  
824 the observed distances  $\Delta\mu_{true}$  are then given by:

$$825 \quad P = 2 \min\left(\frac{\mathbf{M}}{N}, 1 - \frac{\mathbf{M}}{N}\right)$$

826 Where  $\mathbf{M}$  is the number of permutations for which  $\Delta\mu_{perm}^i > \Delta\mu_{true}$ .

827 In addition to testing for a significant main effect of the stimulation we tested for significant  
828 stimulation by group interaction. We first evaluated the true difference between the effect sizes for  
829 the two groups as:

$$830 \quad \Delta_{true} = (\mu_s^{JAWS} - \mu_n^{JAWS}) - (\mu_s^{GFP} - \mu_n^{GFP})$$

831 The approximate distribution of this difference under the null hypothesis that there was no difference  
832 between the groups was evaluated by creating an ensemble of permuted datasets in which we  
833 randomly assigned subjects to the JAWS and GFP groups and the interaction P value was calculated as  
834 above.

835 Permutation testing was also used to assess significance differences in logistic regression model fits  
836 to the behaviour of subjects run on the task variants with and without reversals in the transition  
837 probability reversals, with permuted datasets generated by permuting subjects between the two  
838 groups.

839 *Bootstrap tests:*

840 To test whether logistic regression predictor loadings were significantly different from zero, bootstrap  
841 confidence intervals on the population means  $\mu$  were evaluated by generating a set of  $N = 5000$   
842 resampled datasets by sampling subjects with replacement. P values for predictor loading significantly  
843 different from zero were calculated as:

$$844 \quad P = 2 \min\left(\frac{\mathbf{M}}{N}, 1 - \frac{\mathbf{M}}{N}\right)$$

845 Where  $\mathbf{M}$  is the number of resampled datasets for which  $\mu > 0$ .

846 *Analysis of simulated data:*

847 For analyses of data simulated from different RL agent types (Figure 2), we first fitted each agent to  
848 our baseline behavioural dataset using the hierarchical framework outlined above. The agents used  
849 were a model-free agent with eligibility traces and value forgetting (Figure 2D-F), and a model-based  
850 agent with value and transition probability forgetting (Figure 2G-I) and the best fitting RL model  
851 described in supplementary results (Figure 2J-L). We then simulated data (4000 sessions each of 500  
852 trials) from each agent, drawing parameters for each session from the fitted population level  
853 distributions for that agent. We performed the logistic regression on the simulated data, using the  
854 same hierarchical framework as for the experimental data.

855 *Calcium imaging analysis:*

856 Pre-processing

857 All imaging videos were pre-processed and motion corrected using custom MATLAB code, using the  
858 Mosaic API (Inscopix). Videos were spatially down sampled 4x4 and motion corrected using a 15 to  
859 20-point specific reference area drawn for each animal (blood vessel pattern). Black pixel borders  
860 inserted during motion correction were then removed by cropping the corrected videos.

861 To extract calcium signals from putative single neurons, we used the MATLAB implementation of the  
862 Constrained non-negative matrix factorization – extended algorithm (CNMF-E) (Zhou et al., 2018).  
863 Putative single units were isolated from the processed imaging videos and subsequently inspected  
864 manually for quality assessment of both spatial masks and calcium time series. Isolated putative units  
865 not matching spatial masks or temporal features of neurons were discarded and not used in following  
866 analyses. All analyses used the deconvolved activity inferred by CNMF-E. For the regression and  
867 trajectory analyses the deconvolved activity was  $\log_2$  transformed. Activity was aligned across trials  
868 by warping the time period between the choice and second-step port entry to match the median trial  
869 timings, activity prior to choice and after second-step port entry was not warped. Following time  
870 warping, activity was up-sampled to 20Hz and Gaussian smoothed with 50ms standard deviation.  
871 Example activity before and after alignment and smoothing are shown in figure S7.

872 Regression analysis of neuronal activity

873 The regression analysis in figure 3E-H used binary predictors coding the choice (top or bottom),  
874 second-step state (right or left) and trial outcome (rewarded or not), as well as the two-way  
875 interactions of these predictors (e.g. choice x second-step). To assess whether coefficients of partial  
876 determination were significantly different from that expected by chance, we generated an ensemble  
877 of 5000 permuted datasets by circularly shifting the predictors relative to the neural activity by a  
878 random number of trials drawn independently for each session from the range [0, N] where N is the

879 number of trials in the session. This permutation preserves the autocorrelation across trials in both  
880 the neural activity and the predictors but randomises the relationship between them. We calculated  
881 P values for each predictor at each time point as the fraction of permutations for which the permuted  
882 datasets had a larger CPD than the true dataset. P values for each predictor were corrected for  
883 multiple comparison across time-points using the Benjamini–Hochberg procedure (Benjamini and  
884 Hochberg, 1995).

885 In figure 3G we evaluated the time course for two orthogonal representations of second-step state  
886 which occurred pre- and post- trial outcome. We defined unit projection vectors from the regression  
887 weights for second-step state at a time point mid-way between choice and outcome and 250ms after  
888 outcome. We then projected the regression weights for second-step state at each time point onto  
889 these two vectors to obtain time-courses for each representation. To avoid selection bias distorting  
890 the time-courses, we divided the data into odd and even trials and used the odd trials to define  
891 projection vectors that weights from the even trials were projected onto, and vice versa.

892 In Figure 5A we used an additional binary predictor coding the state of the transition probabilities  
893 (*top → right / bottom → left vs top → left / bottom → right*), binary predictors coding the interaction of  
894 the transition probabilities with the choice and second step, and the transition on the current trial  
895 coded clockwise (e.g. *top → right*) vs counter-clockwise – i.e. whether the transition was common or  
896 rare. In figure 5B we used a predictor which coded the state of the reward probabilities as -0.5, 0, 0.5  
897 for the *left-good*, *neutral* and *right-good* states respectively, as well as the interactions of this  
898 predictor with the choice, second-step and transition on the current trial. As the subjects knowledge  
899 of the transition/reward probabilities is ambiguous in the period following block transitions where  
900 they change, these predictors were coded 0 in the 20 trials following such changes, and  $\pm 0.5$  at other  
901 times. These analyses included only sessions where we had at least 40 trials in at least two different  
902 states of the transition (Figure 5A) or reward (Figure 5B) probabilities.

### 903 Neuronal trajectory analysis

904 The activity trajectories in figure 4 were obtained by projecting the average population activity for  
905 each trial type into the low dimensional space that captured most variance between trial types, where  
906 trial type was defined by the 8 possible combinations of choice, second-step and outcome. To find  
907 this space, we calculated the average activity for each neuron for each trial type. We then averaged  
908 these across trial types to evaluate the component of activity that was not selective to different trial  
909 types. We subtracted the non-selective activity for each neuron from that neurons average activity for  
910 each individual trial type, and concatenated across trial types to generate a data matrix of shape [n  
911 neurons, n trial types \* n time point] representing how activity for each neuron deviated from its cross-



912 trial-type average in each trial type. We performed PCA on this matrix to find the space that captured  
913 the most cross-trial-type variance and then projected the average population activity trajectory for  
914 each trial type into this space to generate figure 4.

915 Supplementary figures:

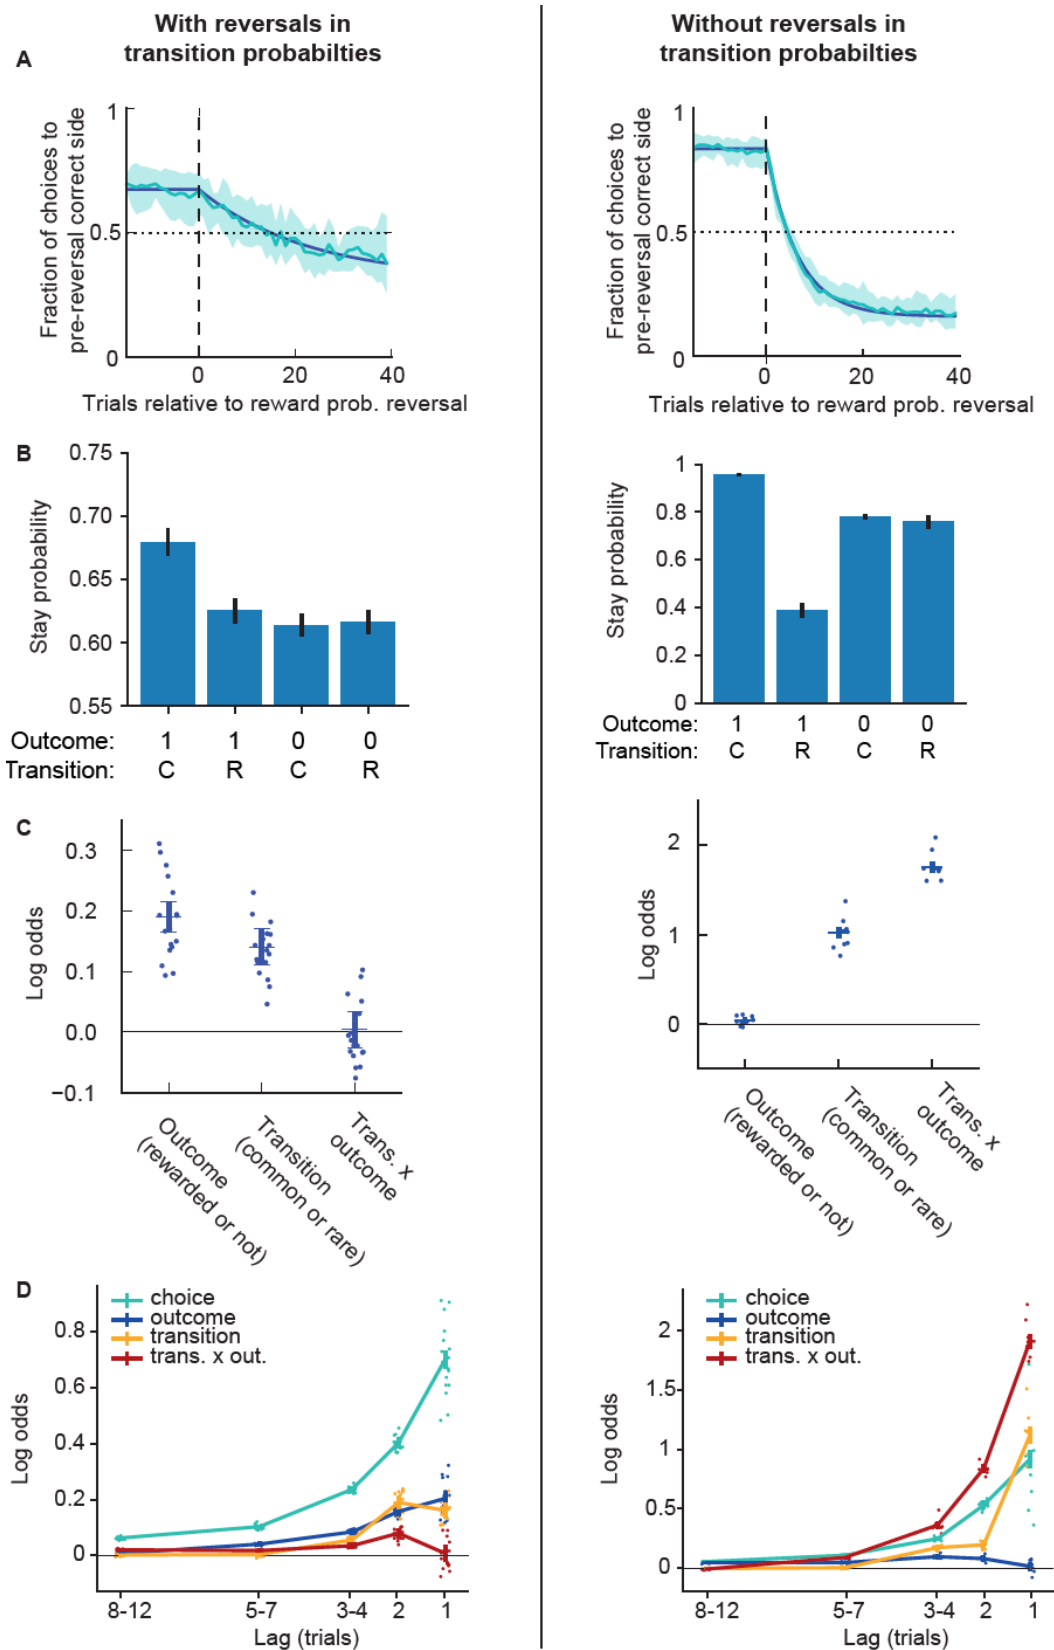

916

917 **Figure S1 Behaviour without transition probability reversals.** Comparison of behaviour a version of the two-  
 918 step task with transition probability reversals (left panels – reproduced from figures 1 and 2 for ease of

919 comparison) and without transition probability reversals (right panel). The tasks were identical apart from the  
920 presence/absence of transition probability reversals. **A)** Choice probability trajectories around reward  
921 probability reversals. Pale blue line – average trajectory, dark blue line – exponential fit, shaded area – cross-  
922 subject standard deviation. **B)** Stay probability analysis showing the fraction of trials the subject repeated the  
923 same choice following each combination of trial outcome (rewarded (1) or not (0)) and transition (common (C)  
924 or rare (R)). Error bars show cross-subject SEM. **C)** Logistic regression model fit predicting choice as a  
925 function of the previous trial's events. Predictor loadings plotted are; *outcome* (repeat choices following  
926 rewards), *transition* (repeat choices following common transitions) and *transition-outcome interaction* (repeat  
927 choices following rewarded common transition trials and non-rewarded rare transition trials). Error bars  
928 indicate 95% confidence intervals on the population mean, dots indicate maximum a posteriori (MAP) subject  
929 fits. **D)** Lagged logistic regression model predicting choice as a function of events over the previous 12 trials.  
930 Predictors are as in **C**, predictor loading at lag  $x$  indicates the influence of events at trial  $t$  on choice at trial  $t +$   
931  $x$ .

932

933

934

935

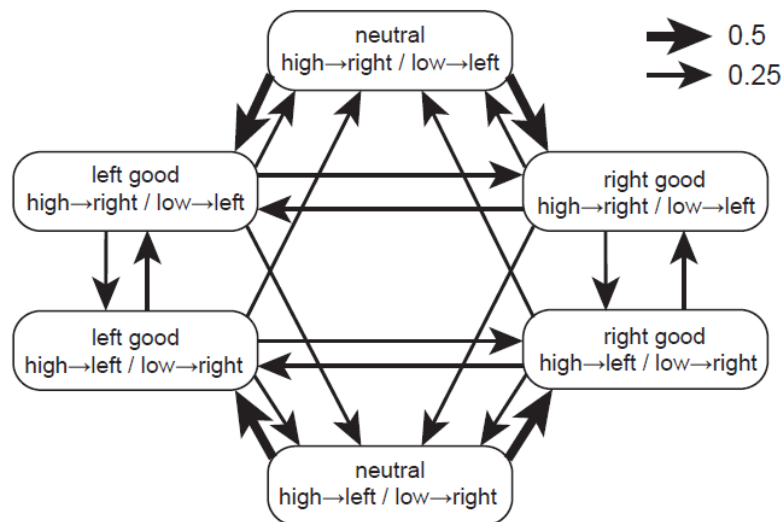

936

937 **Figure S2. Block transition probabilities.** Diagram of block transition probabilities for the two-step task.

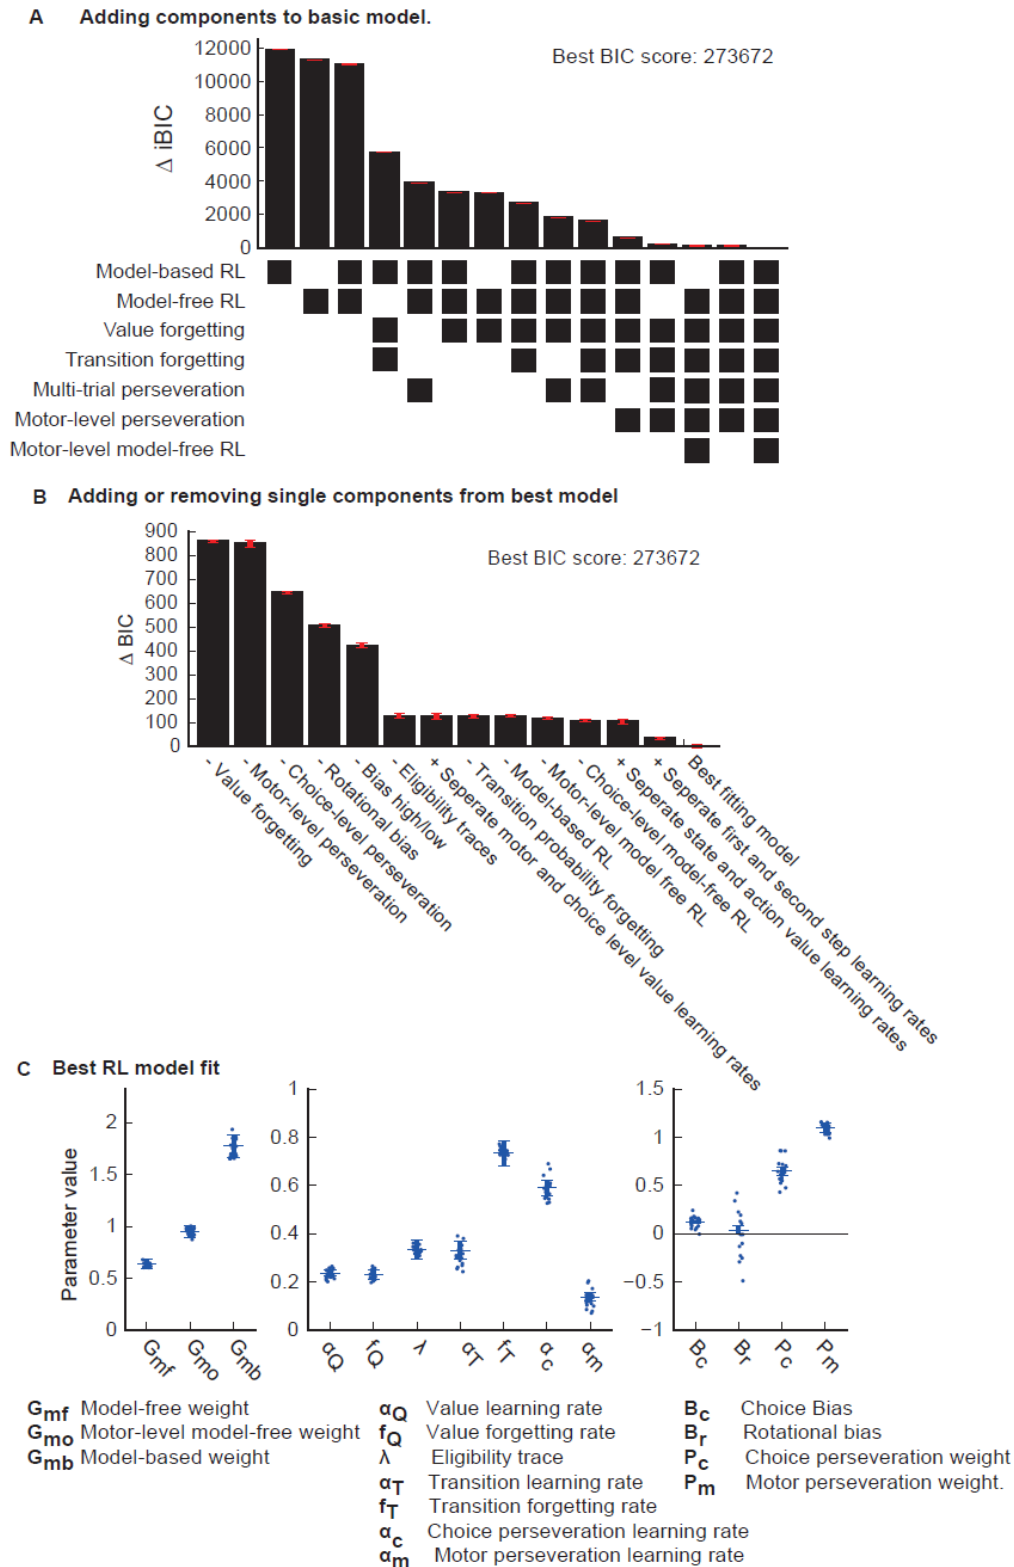

938

939 **Figure S3 Baseline dataset BIC score model comparison.** **A)**  $iBIC$  score comparison for set of RL models on  
 940 baseline behavioural dataset. The set of models was constructed as described in supplementary results by  
 941 iteratively adding features to the RL model. The grid below the plot indicates which features were included in  
 942 each model. **B)**  $iBIC$  score comparison on the baseline dataset for set of RL models created by adding or  
 943 removing a single feature at a time from the best fitting model. The text below each bar indicates what feature  
 944 has been added or removed. Error-bars indicate the bootstrap 95% confidence interval on the BIC score. **C)**  
 945 Parameter values for best fitting RL model. Bars indicate 95% confidence intervals on the population mean, dots  
 946 indicate maximum a posteriori (MAP) subject fits.

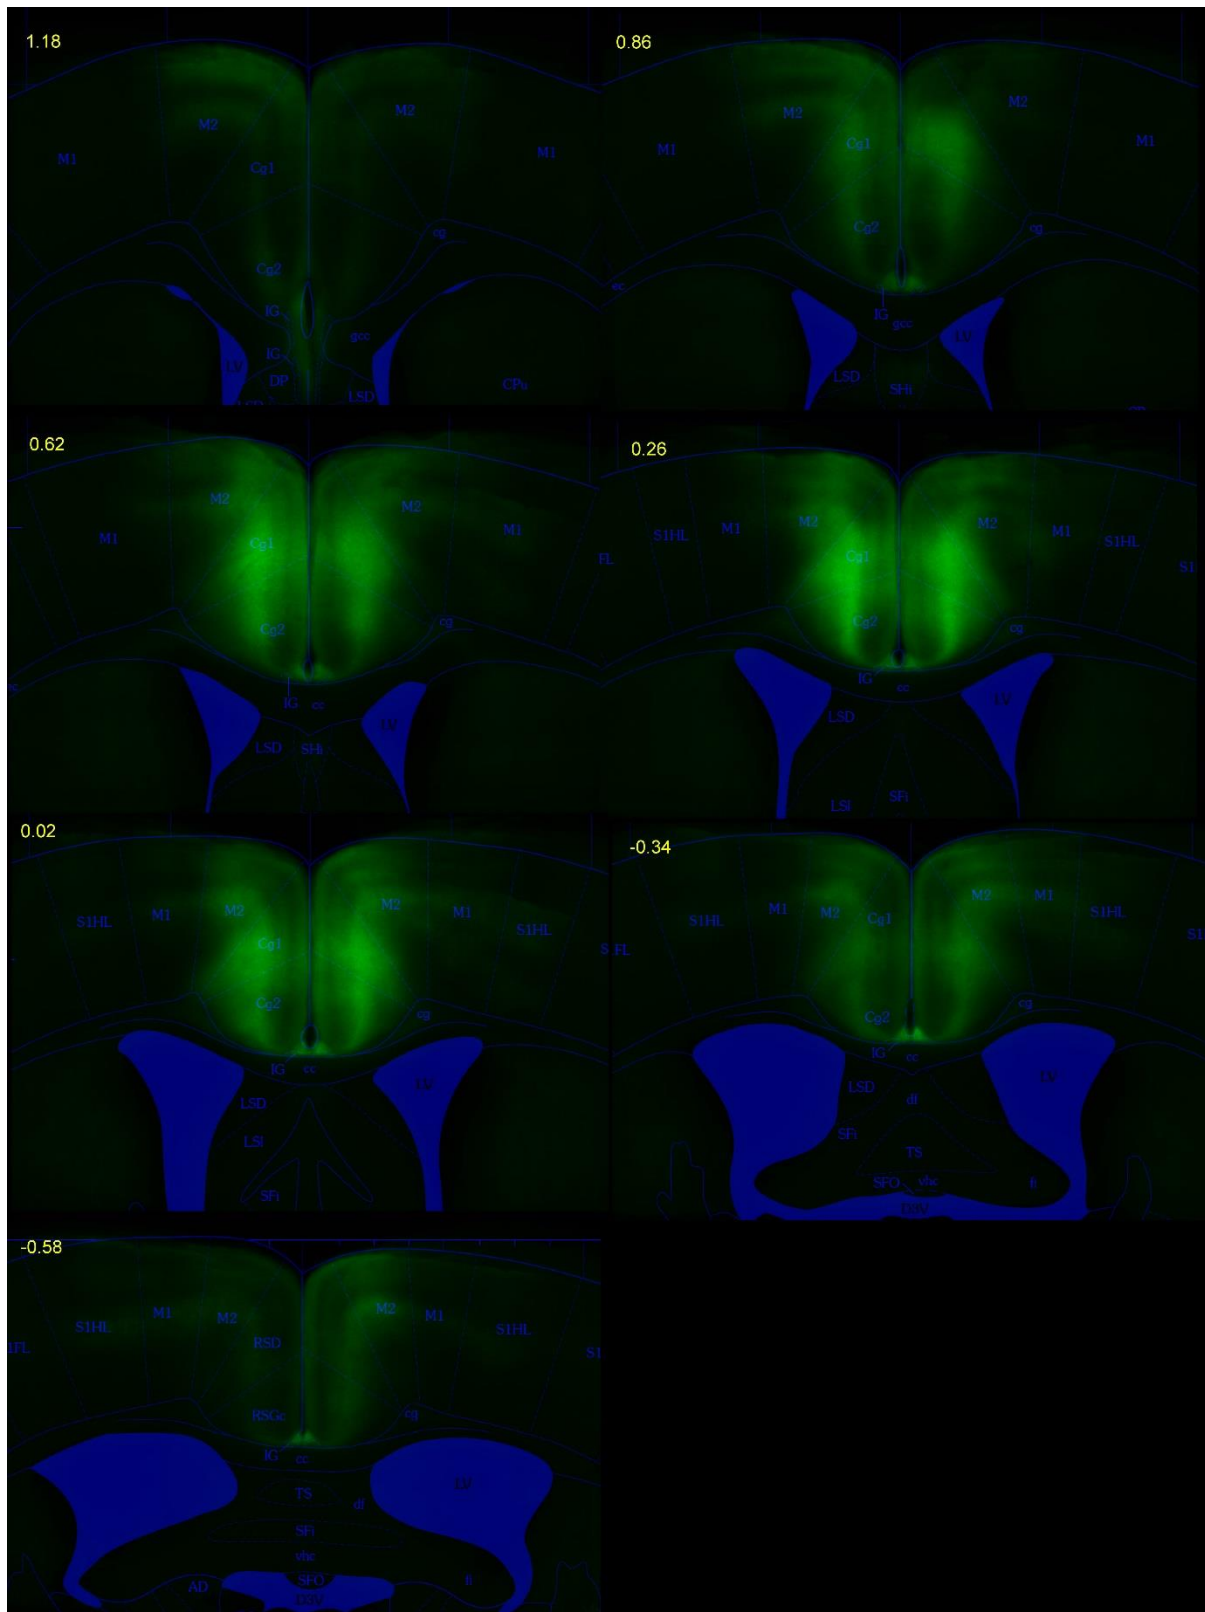

947

948 **Figure S4. JAWS expression.** Average JAWS-GFP fluorescence for all JAWS-GFP animals included in the study  
949 aligned onto reference atlas (Paxinos and Franklin, 2007). Numbers indicate anterior-posterior position relative  
950 to bregma (mm).

951

952

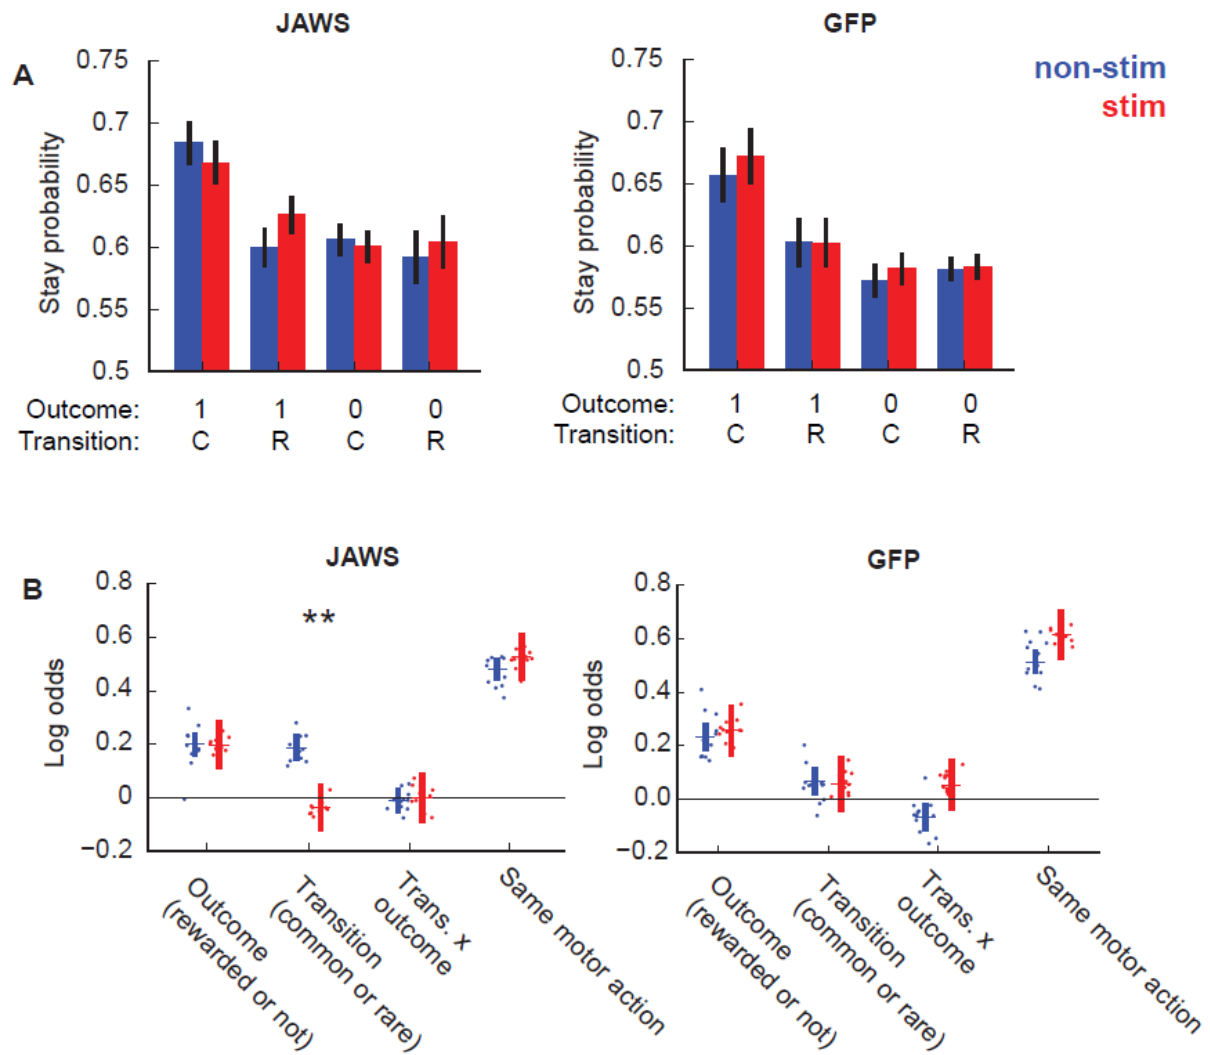

953

954 **Figure S5. Optogenetic silencing of ACC in two-step task. A)** Stay probabilities analysis on stimulated (red) and  
 955 non-stimulated (blue) trials in JAWS (top panel) and GFP (bottom panel). **B)** Regression analysis including  
 956 additional predictor *same motor action* – repeat choices if this requires the same motor action (e.g. left→top).

### A Trial events

1. Poke centre to initiate trial.

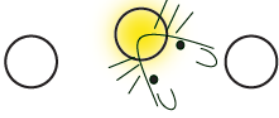

2. Choose left or right for probabilistic reward.

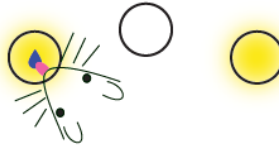

### C Reversal analysis

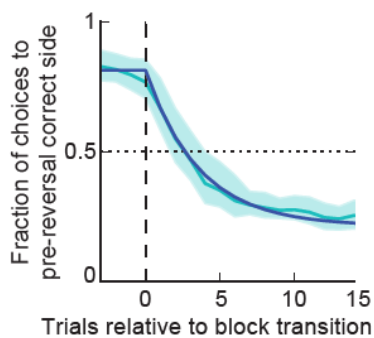

### B Example session

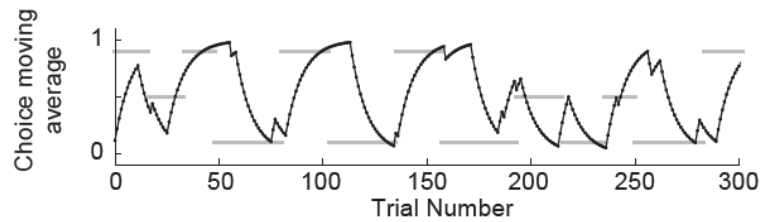

### D ACC inhibition

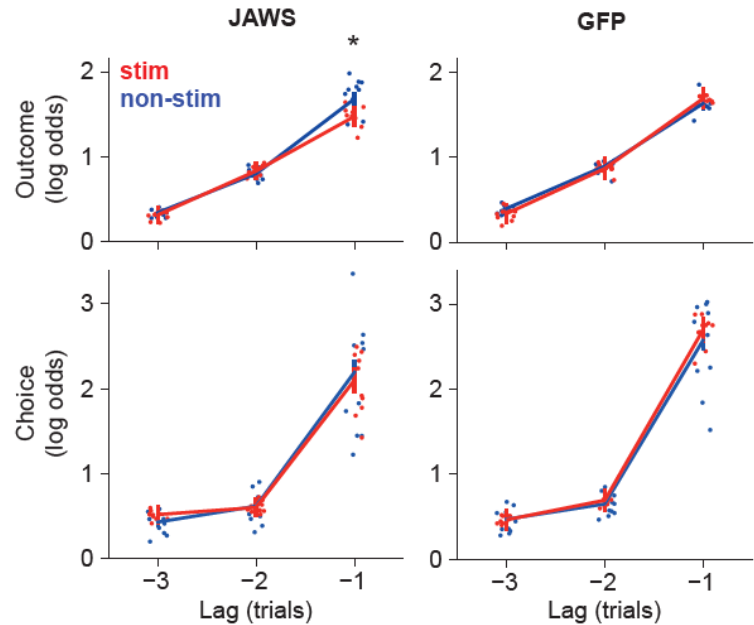

957

958 **Figure S6. Optogenetic silencing of ACC in probabilistic reversal learning task.** **A)** Diagram of apparatus and  
 959 trial events. **B)** Example session, black line shows exponential moving average ( $\tau = 8$  trials) of choices, grey  
 960 bars indicate reward probability blocks with y position of bar indicating whether left or right side has high reward  
 961 probability or a neutral block. **C)** Choice probability trajectories around reversal in reward probabilities: Pale blue  
 962 line – average trajectory, dark blue line – exponential fit, shaded area – cross-subject standard deviation. **D)**  
 963 Logistic regression analysis showing predictor loadings for stimulated (red) and non-stimulated (blue) trials, for  
 964 the ACC JAWS (left panel) and GFP controls (right panel). Bars indicate 95% confidence intervals on the  
 965 population mean, dots indicate maximum a posteriori (MAP) subject fits. \* indicates significant difference  
 966 (Bonferroni corrected  $P < 0.05$ ) between stimulated and non-stimulated trials.

967



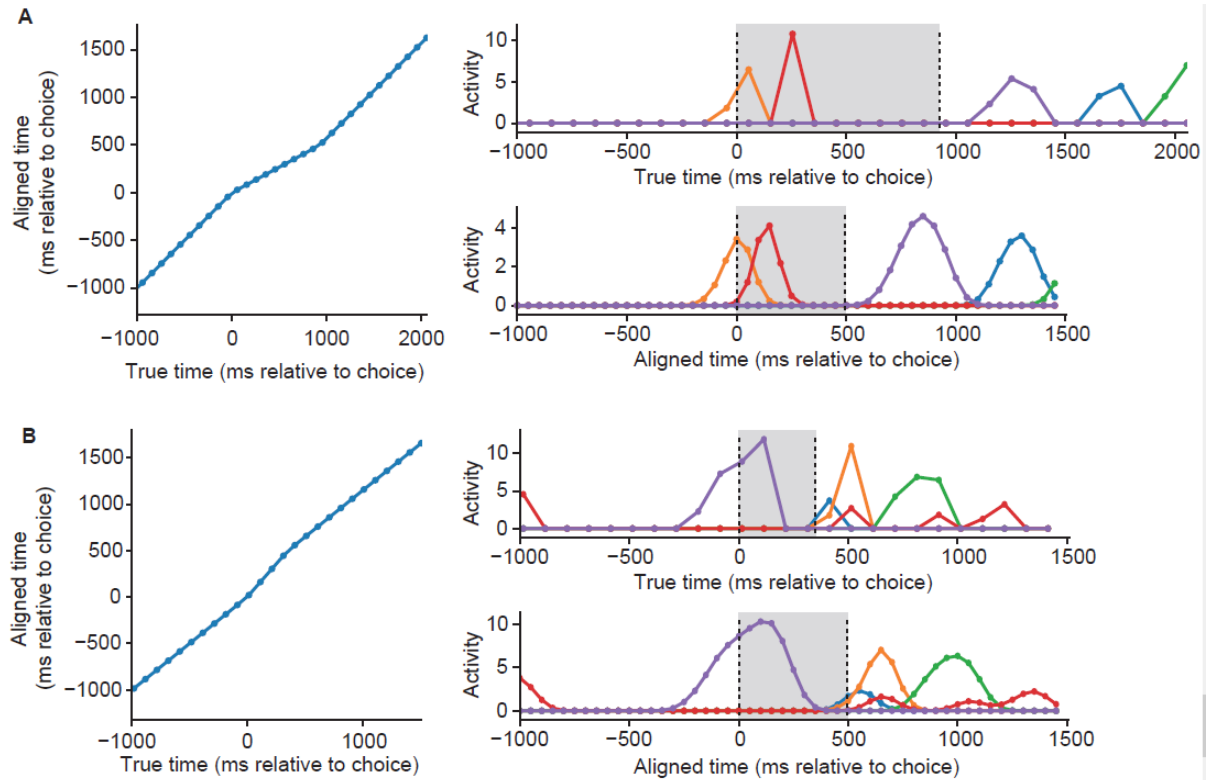

968

969 **Figure S7. Calcium imaging alignment, up-sampling and smoothing.** **A)** Alignment of imaging data on a trial  
970 where the interval between choice and second-step port entry was longer than the median interval. Left panel  
971 shows the true and aligned times of microscope frames plotted against each other. Right top panel shows the  
972 activity of 5 neurons before alignment. Vertical dashed lines show the times of choice and second-step port  
973 entry. Right bottom panel shows the activity of the same 5 neurons after alignment, up-sampling and smoothing.  
974 Grey shaded regions indicate the interval between choice and second-step port entry that is time-warped **B)** As  
975 for **A** but for a trial where the interval between choice and second-step port entry was shorter than the median  
976 interval.

## 977 Supplementary Results:

### 978 *Comparison of task variants with and without transition probability reversals.*

979 We introduced reversals in the transition probability mapping the first-step actions to the second-step  
980 states, because without them, extensively trained animals could in principle learn strategies that look  
981 like model-based RL but in fact rely on latent state inference rather than planning (Akam et al., 2015).  
982 We therefore asked what impact dynamically changing transition probabilities had on behaviour by  
983 running a version of the task where the transition probabilities linking the first step actions to second-  
984 step states were fixed (n=10 mice, 240 sessions analysed from day 22+ of training). Subjects were  
985 much better at tracking which option was best, choosing the correct option at the end of blocks on  
986  $0.83 \pm 0.04$  (mean + SD) of trials, and adapting to reversals with a time constant of 6.5 trials ( $P < 0.001$   
987 for difference between tasks on both measures, permutation test) (Figure S3A). Note that fixing the  
988 transition probabilities does not change the contrast between good and bad choices in terms of their  
989 reward probabilities. The granular structure of behaviour was also different (Figure S3 B-D), with a  
990 very strong influence of the transition-outcome interaction on the subsequent choice ( $P < 0.001$ ,  
991 bootstrap test), a strong influence of the state transition ( $P < 0.001$ ), but no direct influence of the  
992 trial outcome ( $P = 0.42$ ) (between task differences at trial -1:  $P < 0.001$  for stronger loading on  
993 transition and transition-outcome interaction predictor,  $P = 0.031$  for weaker loading on outcome,  
994 permutation test).

995 These data show that in the fixed task, where subjects can, in principle, learn habit-like mappings from  
996 where rewards have recently been obtained to the correct first-step action (e.g. rewards on the left  
997  $\rightarrow$  choose up), overall performance was higher and behaviour showed a strong transition-outcome  
998 interaction, which can be generated by model-based RL or such latent state inference based strategies  
999 (Akam et al., 2015). The striking differences between behaviour on the fixed task and the version  
1000 with transition reversals suggest that subjects do indeed solve them using different strategies. As our  
1001 aim is to address neural mechanisms of model-based planning, for our investigation of ACC we  
1002 focussed on the version of the task with changing transition probabilities designed to resist latent  
1003 state strategies.

### 1004 *Model comparison:*

1005 The starting point for our model comparison was the RL agent used in the Daw two-step task (Daw et  
1006 al., 2011). As the action-state transition probabilities in our task were not fixed, we modified the  
1007 model-based component of the agent to update its estimate of the transition probabilities for the  
1008 chosen action on each trial using an error driven learning rule. As in the original Daw agent we  
1009 included a perseveration parameter which promoted repeating the previous choice.

1010 We observed that some subjects appeared to have a bias to move either clockwise or counter-  
1011 clockwise around the set of pokes (e.g. left→top, right→bottom). Including this predictor in the  
1012 logistic regression model substantially improved the models integrated Bayes Information Criterion ( $\Delta$   
1013 iBIC = 2639). Subjects may have developed these biases because it is the simplest fixed response  
1014 pattern that was not penalised by the block transition rule (as block transitions were triggered based  
1015 behaviour, a bias for the top or bottom port resulted in that port spending more the time as the bad  
1016 option). Based on the evidence for this 'rotational' bias in the logistic regression, we included it in the  
1017 RL models in addition to a standard choice bias.

1018 We compared the goodness of fit of a pure model-free agent, a pure model-based agent, and an agent  
1019 which used a mixture of both strategies. The mixture agent provided a better fit to the data than  
1020 either the pure model-free ( $\Delta$  iBIC = 264, Figure S2A) or pure model-based agent ( $\Delta$  iBIC = 888), and  
1021 the mixture model fit suggested an approximately equal contribution of model-based and model-free  
1022 control. However, as the task is novel and hence we do not know what features may be present in  
1023 the behaviour, we performed an exploratory process of model comparison to test whether adding  
1024 additional features better captured the behaviour. This identified a number of features which greatly  
1025 improved fit quality.

1026 RL models typically assume that values of actions that are not chosen remain unchanged. However, it  
1027 has been reported that model-fits in some rodent decision making tasks are substantially improved  
1028 by including forgetting about the value of not chosen actions, typically implemented as action value  
1029 decay towards zero (Ito and Doya, 2009, 2015). Including such action value forgetting in the mixture  
1030 agent produced a dramatic improvement in iBIC score for our data ( $\Delta$  iBIC = 7698). Including forgetting  
1031 about action-state transition probabilities, implemented as a decay of transition probabilities for the  
1032 not chosen action towards a uniform distribution, further improved the goodness of fit ( $\Delta$  iBIC = 643).  
1033 The mixture agent including value and transition probability forgetting again showed approximately  
1034 equal weighting of the model-based and model-free action values in controlling behaviour. When  
1035 forgetting was included for each agent the mixture agent provided a better fit to the data than either  
1036 a pure model-free ( $\Delta$  iBIC = 612) or pure model-based ( $\Delta$  iBIC = 3066) agent.

1037 Forgetting decreases the value of not chosen relative to chosen options, and therefore promotes  
1038 choice perseveration. It is therefore possible that if subjects are in fact strongly perseverative, this  
1039 could be mistakenly identified as forgetting. Though the model included a perseveration parameter  
1040 for repeating the previous choice, several studies have reported perseveration effects spanning  
1041 multiple trials, even in tasks where decisions optimally should be treated as independent (Gold et al.,  
1042 2008; Akaishi et al., 2014). We therefore tested whether goodness of fit was improved by an  
1043 exponential choice kernel through which prior choices directly influenced the current choice with

1044 exponentially decreasing weight at increasing lag. This is equivalent to the decision inertia model of  
1045 Akaishi et al. (2014). The addition of this exponential choice kernel dramatically improved fit quality  
1046 when added to the mixture agent without forgetting ( $\Delta$  iBIC = 7133). However even with the  
1047 exponential choice kernel included, value forgetting substantially improved goodness of fit ( $\Delta$  iBIC =  
1048 2071), and transition probability forgetting further increased goodness of fit ( $\Delta$  iBIC = 194). These  
1049 results indicate that forgetting about values and transitions for not chosen options is a genuine feature  
1050 of the behaviour and not an artefact due to perseveration. They further indicate that subjects do in  
1051 fact show a strong tendency to perseverate over multiple trials, which is not captured even by  
1052 forgetting RL models, presumably because it is independent of the recent reinforcement history.  
1053 Forgetting may be a heuristic used in dynamic environments where evidence becomes less reliable  
1054 with the passage of time due to state of the world changing. Alternatively, forgetting may occur due  
1055 to limitations of the learning systems involved, perhaps due to discrepancy between the rapidly  
1056 changing reward statistics in the task and those typical of natural environments.

1057 The choice kernel assumes that perseveration occurs at the level of the decision between the top and  
1058 bottom pokes. However, in the current task, a given choice (top or bottom) entails a different motor  
1059 action depending on which side (left or right) the previous trial ended on. We therefore considered a  
1060 model with perseveration at the motor level such that the choice on a given trial only increased the  
1061 probability of repeating the same motor action in future, e.g. a choice taken by moving from the left  
1062 to top poke only increased the probability of choosing top in future following trials which ended on  
1063 the left side. Motor perseveration was modelled by maintaining separate moving averages of choices  
1064 following trials that ended on the left and right, which each influenced choices following trials ending  
1065 on their respective sides. Replacing the exponential choice kernel with this motor level perseveration  
1066 substantially improved fit quality ( $\Delta$  iBIC = 1004). However, including perseveration both at the level  
1067 of choice, (top vs bottom, independent of motor action), and at the motor level, further improved fit  
1068 quality ( $\Delta$  iBIC = 499), indicating that subjects have perseverative tendencies at both choice and motor  
1069 levels that are not predicted by the RL component of the model. These data support the existence of  
1070 mechanisms which reinforce selected behaviours in a reward-independent fashion, i.e. simply  
1071 choosing to execute a behaviour increases the chance that behaviour will be executed in future. This  
1072 is consistent with previous reports from perceptual (Gold et al., 2008; Akaishi et al., 2014) and reward-  
1073 guided decision making tasks (Miller et al., 2019), and we think is a parsimonious explanation for our  
1074 results. Such perseveration may be a signature of a mechanism for automatizing behaviour by  
1075 reinforcing chosen actions. Thorndike proposed such a 'law of exercise' (1911) and the idea has  
1076 recently been revisited by Miller et al. (Miller et al., 2019) who suggest that habit formation occurs  
1077 through outcome-independent reinforcement of chosen actions. This framework views habit

1078 formation as a supervised learning process in which behaviour generated by value sensitive systems,  
1079 i.e. model-free and model-based RL, is used to train value-independent learning systems. Such a  
1080 mechanism could account for multi-trial perseveration effects observed in our data. An alternative  
1081 mechanism which could generate perseveration would be subjects sampling an option multiple times  
1082 between choices, which may be adaptive if the decision process is costly in time or effort. However,  
1083 this does not account for the observation in our data that perseveration occurred at the level both of  
1084 choices and of motor actions, with different timescales for each (see respective learning rates, Figure  
1085 S2 C).

1086 Evidence that perseveration occurred both at the level of choice and motor action raises the question  
1087 of whether reward driven learning also occurs at both levels of representation. This might be expected  
1088 from the architecture of parallel cortical-basal ganglia loops, with circuits linking somatosensory and  
1089 motor cortices to dorsolateral striatum learning values over low level motor representations, and  
1090 circuits linking higher level cortical regions to medial and ventral striatum learning values over more  
1091 abstract state and action representations. Indeed, human two-step task behaviour shows evidence  
1092 of model-free value accruing to low level sensory-motor features (Shahar et al., 2019). We therefore  
1093 tested an agent in which model-free action values were learned in parallel for actions represented  
1094 both in terms of choice (top/bottom) and motor action (e.g. left→top). This improved goodness of fit  
1095 ( $\Delta$  iBIC = 117) and the resulting model fit indicated that motor-level model-free values had a somewhat  
1096 stronger influence on behaviour than the choice level model-free values. With multi-trial  
1097 perseveration kernels and motor level effects included in each model, the mixture agent again  
1098 provided a better fit to the data than either a pure model-free ( $\Delta$  iBIC = 127) or pure model-based ( $\Delta$   
1099 iBIC = 227) agent.

1100 We tested a number of other modifications to the model including separate learning rates at the first  
1101 and second step, but did not find further improvements in fit quality (Figure S2B). Finally, as adding  
1102 features to the model may make other features which previously improved the fit unnecessary, we  
1103 tested whether removing any individual component from the model improved fit quality but again did  
1104 not find further improvements (Figure S2B).

1105 *Motor effects do not explain ACC inhibition effect on transition predictor.*

1106 Evidence for perseveration and model-free RL at the motor level raises a possible alternative  
1107 interpretation of why ACC inhibition reduced the influence of common vs rare state transitions on  
1108 choices. This is because the state transition determines which second-step state the subject ends up  
1109 in, and hence the motor action required to repeat the choice on the next trial. To test whether motor-  
1110 level factors can account for the ACC inhibition effect, we analysed the ACC inhibition data using a

1111 logistic regression analysis including an additional predictor which coded a tendency to repeat choices  
1112 when this required the same motor action as the previous trial (Figure S5B). Although *same motor*  
1113 *action* significantly predicted repeating choice ( $P < 0.0001$ , bootstrap test), ACC inhibition had no  
1114 effect on the *same motor action* predictor ( $P = 0.94$  uncorrected), and the effect of ACC inhibition on  
1115 the common/rare transition predictor remained significant (Bonferoni corrected  $P = 0.0032$ , stim-by-  
1116 group interaction  $P = 0.032$ ). We also tested whether the observed correlation between the ACC  
1117 inhibition effect on the transition predictor and subjects use of model-based RL (Figure 6E) was  
1118 specific, by using a multiple linear regression to predict the strength of opto effect across subjects  
1119 using a set of parameters from the RL model: model-based weight ( $G_{mb}$ ), model-free weight ( $G_{mf}$ ),  
1120 motor model-free weight ( $G_{mo}$ ), and motor-perseveration ( $P_m$ ). Model-based weight predicted the  
1121 strength of opto effect on the transition predictor ( $P = 0.03$ ), but none of the other parameters did ( $P$   
1122  $> 0.45$ ). Together these results argue that the effect of ACC inhibition on sensitivity to action-state  
1123 transitions is mediated by disrupted model-based RL and not motor level factors.

#### 1124 *ACC inhibition in a probabilistic reversal leaning task:*

1125 We assessed the effects of the same ACC manipulation used in the two-step task on a probabilistic  
1126 reversal learning task ( $n = 10$  JAWS mice, 202 sessions, 10 GFP mice, 202 sessions). In this task both  
1127 model-free and model-based RL are expected to generate qualitatively similar influence of trial events  
1128 on subsequent choice, i.e. rewarded choices will be reinforced, though there may be quantitative  
1129 differences if the model-based system is able to learn the block structure and infer block transitions  
1130 rather than relying on TD value updates.

1131 Subjects initiated trials in a central port, then chose left or right for a probabilistic reward (Figure S6A).  
1132 Mice tracked the correct option (Figure S6 B,C), choosing correctly at the ends of blocks with  
1133 probability  $0.80 \pm 0.04$  (mean  $\pm$  SD), and adapting to reversals with a time constant of 3.57 trials  
1134 (exponential fit  $\tau$ ). Parameters for optogenetic silencing were matched as closely as possible to  
1135 those used in the two-step task, with the same viral vector, injection sites and stimulation parameters.  
1136 Stimulation was delivered from when subjects poked in the side port and received the trial outcome  
1137 until the subsequent choice.

1138 We assessed the effect of ACC silencing using a logistic regression analysis with previous choices and  
1139 outcomes as predictors (Figure S6 D). Previous choices predicted the current choice with decreasing  
1140 influence at increasing lag. Rewards predicted repeating the rewarded choice, with decreasing  
1141 influence at increasing lag. ACC inhibition subtly reduced the influence of the most recent outcome  
1142 (permutation test  $P = 0.024$  Bonferroni corrected for 6 predictors, stimulation-by-group interaction  $P$   
1143  $= 0.014$ ). These data suggest that while ACC did participate in this simple reward guided decision task,

1144 its contribution could largely be compensated for by other regions, consistent with model-based and  
1145 model-free control both recommending repeating rewarded choices.
